# Supplementary material
Source: publisher figshare collection journal article supplement (https://gsajournals.figshare.com/ndownloader/files/21729744)
Supplement: Supplementary file 1 [file 21729744]

## Sheet: Readme
File S2
Gene expression changes following SACY-1 depletion in the germline and soma.
WormbaseID	Wormbase identifier based on Ensembl 97 annotation.
Gene Name	Gene symbol.
Gene Type	Descriptive indicator of the gene type.
Mean Counts Across Samples	The mean counts across all samples analyzed.
Soma Control FPKM	Normalized mean FPKM values for the soma Control.
Soma Deplete FPKM	Normalized mean FPKM values for the soma SACY-1 deplete.
Germline Control FPKM	Normalized mean FPKM values for the germline Control.
Germline Deplete FPKM	Normalized mean FPKM values for the germline SACY-1 deplete.
Log2 Fold Change Soma	Log2 fold change between the soma control and soma SACY-deplete.
BH Corrected p-value Soma	Benjamini–Hochberg adjusted p-value for the transcript abudance change in the soma.
Log2 Fold Change Germline	Log2 fold change between the soma control and germline SACY-deplete.
BH Corrected p-value Germline	Benjamini–Hochberg adjusted p-value for the transcript abudance change in the germline.

## Sheet: Differentially Expressed Genes
WormbaseID	Gene Name	Gene Type	Mean Counts Across Samples	Soma Control FPKM	Soma Deplete FPKM	Germline Control FPKM	Germline Deplete FPKM	Log2 Fold Change Soma	BH Corrected p-value Soma	Log2 Fold Change Germline	BH Corrected p-value Germline
WBGene00021898	Y54G2A.36	protein_coding	1961.41	43.044	52.228	36.246	192.161	0.27743	0.0916789	2.40527	5.70506e-111
WBGene00002018	hsp-16.41	protein_coding	3946.07	47.013	144.831	493.773	141.999	1.62279	5.42093e-34	-1.79751	2.66143e-55
WBGene00002016	hsp-16.2	protein_coding	2463.37	38.415	110.797	308.565	102.989	1.52734	7.65715e-29	-1.58266	2.19636e-41
WBGene00002026	hsp-70	protein_coding	2057.97	12.197	29.844	72.537	20.282	1.29149	3.78748e-15	-1.83831	1.84241e-39
WBGene00002015	hsp-16.1	protein_coding	765.578	19.675	47.076	128.666	41.316	1.25667	3.81613e-14	-1.63701	4.63212e-34
WBGene00002020	hsp-16.49	protein_coding	1569.14	36.088	95.468	268.734	90.06	1.40421	7.22375e-20	-1.57654	4.63212e-34
WBGene00009692	F44E5.5	protein_coding	1865.66	8.083	21.492	68.481	21.353	1.41135	1.20784e-17	-1.68081	1.68178e-33
WBGene00009691	F44E5.4	protein_coding	2433.58	11.835	29.816	86.064	28.184	1.33311	3.81715e-17	-1.61018	1.09221e-32
WBGene00015993	C18H7.1	protein_coding	1129.25	31.596	19.021	42.998	14.049	-0.732131	2.54348e-05	-1.61258	4.01289e-30
WBGene00271415	T05A7.13	protein_coding	420.867	14.934	17.483	5.06	17.43	0.226961	0.38735	1.77811	8.5604e-25
WBGene00000616	col-39	protein_coding	1829.01	42.476	56.298	104.786	39.767	0.407784	0.0333356	-1.39749	6.98498e-24
WBGene00002019	hsp-16.48	protein_coding	679.613	16.263	36.585	126.895	32.845	1.16749	1.69764e-06	-1.94874	1.2072e-23
WBGene00011124	sdz-27	protein_coding	4641.17	252.792	294.932	123.376	260.849	0.222298	0.162656	1.07983	1.2072e-23
WBGene00000601	col-12	protein_coding	664.779	14.614	20.168	36.787	14.061	0.467246	0.0134121	-1.38911	1.82949e-23
WBGene00014173	ZK970.7	protein_coding	753.111	22.812	34.099	27.697	97.599	0.573696	0.0250384	1.81665	4.76613e-23
WBGene00000681	col-107	protein_coding	3678.92	93.116	89.593	267.768	97.049	-0.0548656	0.85306	-1.46394	1.25825e-21
WBGene00020596	oga-1	protein_coding	1647.57	10.004	15.989	32.919	14.819	0.678864	4.667e-06	-1.15092	1.41393e-21
WBGene00004300	ram-2	protein_coding	3238.56	72.392	65.247	206.33	74.316	-0.149039	0.583345	-1.47308	5.8129e-21
WBGene00000720	col-147	protein_coding	4004.94	114.32	101.963	184.215	85.316	-0.164638	0.38511	-1.10998	1.07088e-20
WBGene00020261	vet-1	protein_coding	1211.29	47.914	41.649	13.157	46.845	-0.203474	0.536734	1.83116	2.56261e-20
WBGene00012899	Y46G5A.7	protein_coding	1477.98	55.41	69.552	22.779	74.958	0.326363	0.253886	1.71883	1.14805e-19
WBGene00003171	mec-7	protein_coding	2815.68	54.493	37.814	110.973	52.417	-0.526103	0.000493015	-1.08139	1.25621e-19
WBGene00017134	EEED8.3	protein_coding	9370.71	340.393	382.68	205.101	458.765	0.168801	0.420607	1.16129	7.72301e-19
WBGene00002017	hsp-16.11	protein_coding	384.45	9.804	23.133	57.087	19.603	1.23831	1.42618e-08	-1.53965	1.3166e-18
WBGene00004814	skr-8	protein_coding	763.26	57.337	49.516	13.165	50.239	-0.211984	0.562218	1.93205	2.26889e-18
WBGene00011328	T01D3.3	protein_coding	1847.55	16.556	10.87	32.978	13.018	-0.606471	0.00227354	-1.33988	4.28573e-18
WBGene00003752	nlp-14	protein_coding	1753.58	58.842	45.823	93.371	46.649	-0.360924	0.0207437	-1.00031	5.16908e-18
WBGene00001387	far-3	protein_coding	2685.33	119.793	169.065	91.106	183.853	0.496331	0.000878533	1.01298	1.88161e-17
WBGene00011113	R07E5.5	protein_coding	116.713	4.317	4.417	4.235	15.061	0.0294519	0.952093	1.83362	1.39638e-16
WBGene00019495	sdz-24	protein_coding	5919.32	248.199	94.869	388.238	172.813	-1.38755	1.2881e-18	-1.16739	2.75405e-16
WBGene00003179	mec-18	protein_coding	728.378	11.589	8.173	20.682	9.644	-0.501212	0.00444759	-1.1	3.10086e-16
WBGene00002085	ins-2	protein_coding	315.212	21.949	22.478	8.947	30.105	0.0329044	0.937616	1.74871	7.26955e-16
WBGene00016658	C45B2.1	protein_coding	1157.98	84.035	157.206	47.094	129.677	0.903938	2.63418e-05	1.46038	7.27281e-16
WBGene00011915	ctf-8	protein_coding	619.95	44.702	47.928	27.503	62.405	0.0987423	0.702379	1.18003	1.09467e-15
WBGene00195034	F40G9.20	ncRNA	136.743	156.671	207.225	113.106	475.582	0.401031	0.322282	2.0695	2.09169e-15
WBGene00018242	F40G9.6	protein_coding	130.589	7.573	10.143	4.853	16.466	0.414191	0.202342	1.76231	2.87309e-15
WBGene00007899	C33D9.5	pseudogene	1258.8	27.502	36.554	14.921	33.536	0.410402	0.0385017	1.16697	3.605e-15
WBGene00013141	Y53C12A.6	protein_coding	182.88	26.09	31.969	20.893	57.167	0.295619	0.302261	1.45012	4.19603e-15
WBGene00000666	col-91	protein_coding	181.535	4.99	4.525	12.295	4.173	-0.13748	0.708754	-1.5584	7.70325e-15
WBGene00013659	Y105C5B.20	protein_coding	228.106	6.791	8.809	4.157	10.845	0.375322	0.131112	1.38049	8.06478e-15
WBGene00044001	C09G4.4	protein_coding	406.727	21.114	21.748	16.321	36.385	0.0398339	0.891885	1.15469	9.27867e-15
WBGene00005833	srw-86	protein_coding	365.648	18.506	24.2	37.664	16.993	0.393989	0.0564892	-1.14717	1.18253e-14
WBGene00012335	W07G4.1	protein_coding	152.169	14.949	15.036	8.103	28.175	-0.00378551	0.993986	1.79881	1.32405e-14
WBGene00004818	skr-12	protein_coding	580.349	44.106	38.226	9.542	35.881	-0.208453	0.613148	1.9086	1.49809e-14
WBGene00219275	Y39G10AR.32	protein_coding	1174.17	83.709	89.717	55.372	117.259	0.0997476	0.685442	1.08162	1.98684e-14
WBGene00044640	B0432.14	protein_coding	1242.08	77.489	47.777	137.84	53.765	-0.697689	0.00206847	-1.35648	3.10597e-14
WBGene00017418	F13B6.3	protein_coding	3469.42	79.598	61.766	148.126	73.972	-0.365189	0.0421742	-1.00112	3.23179e-14
WBGene00002055	ifc-1	protein_coding	2570.31	51.406	37.168	91.873	38.162	-0.467231	0.0393406	-1.2666	3.56258e-14
WBGene00012239	W04A8.4	protein_coding	4215.3	104.647	110.356	62.967	130.465	0.0760689	0.765764	1.05095	4.73951e-14
WBGene00004816	skr-10	protein_coding	729.185	58.779	48.999	12.718	45.698	-0.263211	0.500758	1.84411	4.74745e-14
WBGene00009071	F23A7.6	pseudogene	130.49	2.248	2.124	0.783	2.896	-0.0902216	0.83902	1.87521	6.09478e-14
WBGene00021726	bath-10	protein_coding	780.811	32.29	31.58	10.093	30.788	-0.0339861	0.935384	1.6087	9.54809e-14
WBGene00012581	Y38E10A.3	protein_coding	156.94	7.704	7.476	2.098	10.22	-0.0492811	0.931896	2.27996	9.67817e-14
WBGene00006097	str-31	protein_coding	62.5871	1.099	3.738	0.38	3.183	1.7556	3.39439e-05	3.06399	1.08218e-13
WBGene00023401	ZK380.t2	pseudogene	670.949	295.88	307.044	205.728	500.318	0.0501686	0.881391	1.28027	1.13954e-13
WBGene00001842	her-1	protein_coding	144.516	9.228	8.794	4.102	16.995	-0.0743434	0.887274	2.0487	1.34741e-13
WBGene00044024	C35A5.11	protein_coding	1618.65	113.579	95.109	41.225	110.42	-0.257051	0.391053	1.42128	1.79133e-13
WBGene00001803	lite-1	protein_coding	395.006	10.476	6.685	15.079	6.71	-0.654094	0.00113121	-1.16667	3.26377e-13
WBGene00015180	B0416.4	protein_coding	376.916	18.309	21.977	9.495	20.783	0.26478	0.231295	1.13026	3.36691e-13
WBGene00015593	C08E3.1	protein_coding	429.364	56.785	59.259	104.445	37.011	0.0588628	0.882915	-1.49178	4.01332e-13
WBGene00010000	F53F8.3	protein_coding	1639.7	87.3	92.626	38.402	100.217	0.0853165	0.810411	1.38283	5.08163e-13
WBGene00019232	ugt-13	protein_coding	291.791	7.797	6.764	8.224	3.272	-0.206423	0.466462	-1.32942	5.55319e-13
WBGene00011741	T12G3.6	protein_coding	4241.82	180.85	203.72	106.661	214.823	0.171756	0.438535	1.00985	5.55319e-13
WBGene00007341	C05D12.4	protein_coding	237.746	9.922	8.827	3.469	10.682	-0.172435	0.637864	1.61635	5.62079e-13
WBGene00009069	F23A7.4	protein_coding	4039.19	214.521	343.339	201.58	451.056	0.677833	0.000673454	1.16217	5.6429e-13
WBGene00013796	Y116A8C.19	protein_coding	77.9909	5.635	4.689	0.731	4.609	-0.263732	0.603694	2.6341	5.70349e-13
WBGene00000740	col-167	protein_coding	793.236	17.741	17.965	45.131	21.264	0.0197299	0.949646	-1.08361	6.29764e-13
WBGene00001702	grd-13	protein_coding	433.325	22.951	19.231	40.509	18.967	-0.252545	0.278209	-1.09197	6.51064e-13
WBGene00000006	aat-5	protein_coding	717.14	9.936	14.015	19.618	9.579	0.496338	0.00788366	-1.03167	7.2281e-13
WBGene00008904	F17A2.13	protein_coding	352.2	15.14	13.132	3.593	12.059	-0.207692	0.599782	1.74367	8.52714e-13
WBGene00019705	fbxb-45	protein_coding	286.384	14.012	14.04	3.441	10.591	-0.000365764	0.999269	1.62231	9.02095e-13
WBGene00017133	EEED8.2	protein_coding	2024.02	93.935	92.266	36.082	92.579	-0.026373	0.945626	1.35892	1.09781e-12
WBGene00012175	W01C9.1	protein_coding	290.333	14.046	12.434	7.75	17.946	-0.177594	0.519113	1.20915	1.72408e-12
WBGene00004212	ptl-1	protein_coding	1113.59	19.014	12.705	31.869	15.816	-0.579925	0.00131927	-1.00896	1.76844e-12
WBGene00016545	C40A11.2	protein_coding	234.116	13.481	13.042	5.157	15.279	-0.0529559	0.897242	1.56319	1.79238e-12
WBGene00016549	C40A11.6	protein_coding	296.806	14.93	14.114	4.55	14.287	-0.0826245	0.846026	1.64649	2.26104e-12
WBGene00016662	C45B2.8	protein_coding	28.2707	0.848	1.311	0.577	8.661	0.654675	0.48209	3.98434	2.27665e-12
WBGene00000691	col-117	protein_coding	984.403	26.37	22.69	63.403	29.284	-0.215073	0.394679	-1.11276	2.55347e-12
WBGene00000594	col-3	protein_coding	942.23	26.697	21.258	61.538	27.058	-0.328835	0.193259	-1.18388	3.14589e-12
WBGene00003750	nlp-12	protein_coding	2985.01	222.427	154.035	495.916	236.2	-0.530187	0.00780735	-1.06962	3.52028e-12
WBGene00020073	sdz-28	protein_coding	597.365	27.626	22.659	6.081	17.854	-0.286158	0.395793	1.5537	3.56788e-12
WBGene00009156	clec-196	protein_coding	1176.41	100.551	112.241	16.715	90.893	0.158329	0.80736	2.44234	3.5726e-12
WBGene00000704	col-130	protein_coding	422.532	9.683	10.51	30.234	10.46	0.12188	0.767617	-1.53397	3.5848e-12
WBGene00000599	col-10	protein_coding	2369.97	70.494	58.701	148.97	70.092	-0.262423	0.266823	-1.08715	3.74841e-12
WBGene00009546	fbxb-3	protein_coding	155.518	5.433	5.545	1.471	5.551	0.0242174	0.963605	1.90857	3.91559e-12
WBGene00015236	B0511.11	protein_coding	222.062	2.273	3.203	3.292	8.882	0.488849	0.119727	1.42372	5.4433e-12
WBGene00011809	T16G12.8	protein_coding	751.149	23.859	24.915	11.661	25.713	0.0621405	0.840207	1.13936	5.968e-12
WBGene00011486	T05E12.3	protein_coding	2546	115.532	149.894	51.894	107.896	0.374449	0.0756665	1.056	6.06326e-12
WBGene00007867	C32H11.4	protein_coding	316.917	7.655	7.21	15.758	7.446	-0.0840699	0.777811	-1.07847	6.3797e-12
WBGene00000717	col-144	protein_coding	1498.66	37.515	45.393	92.993	43.69	0.277731	0.246879	-1.08912	8.337e-12
WBGene00016595	C42D4.2	protein_coding	135.14	2.819	2.835	1.053	3.226	0.00941316	0.983696	1.61149	8.337e-12
WBGene00202514	T09F5.20	protein_coding	34.8221	1.35	1.802	1.043	8.166	0.394391	0.612396	2.9494	1.05168e-11
WBGene00017135	EEED8.4	protein_coding	248.921	17.121	14.646	4.262	15.332	-0.226267	0.606274	1.84348	1.08289e-11
WBGene00008823	F14H3.4	protein_coding	2057.32	80.528	102.033	38.551	88.825	0.340698	0.186523	1.2036	1.32604e-11
WBGene00018471	F45E4.6	protein_coding	61.409	1.199	1.346	0.814	3.605	0.17625	0.765709	2.14567	2.08418e-11
WBGene00013701	Y106G6D.4	protein_coding	152.756	4.326	1.966	7.386	2.447	-1.1386	0.000101081	-1.58342	2.48647e-11
WBGene00003165	mec-1	protein_coding	748.522	2.982	3.695	6.308	2.825	0.310252	0.229067	-1.15661	2.70476e-11
WBGene00016071	C24H12.1	protein_coding	485.935	16.372	17.008	6.485	16.419	0.0514094	0.892753	1.33766	3.61096e-11
WBGene00018595	fbxa-145	protein_coding	333.081	8.567	10.652	7.244	14.533	0.316286	0.14837	1.00311	3.64714e-11
WBGene00000669	col-94	protein_coding	1055.99	29.413	33.554	58.087	27.95	0.193416	0.447505	-1.0543	4.25719e-11
WBGene00206522	F14D2.19	protein_coding	2425.78	63.936	29.162	110.104	63.269	-1.13166	4.53911e-17	-0.798749	5.48874e-11
WBGene00019514	K08B4.2	protein_coding	257.752	21.581	23.031	7.347	20.258	0.0934479	0.812482	1.4576	6.75685e-11
WBGene00012074	T27A8.2	protein_coding	328.281	20.33	25.233	13.606	27.961	0.310482	0.171025	1.04007	8.19796e-11
WBGene00011251	glb-22	protein_coding	243.323	5.443	6.405	14.096	5.788	0.236831	0.46791	-1.2817	8.78845e-11
WBGene00219949	F44E5.16	ncRNA	66.8797	8.657	14.186	8.552	36.728	0.699448	0.152503	2.08753	9.85636e-11
WBGene00021601	Y46H3A.5	protein_coding	266.078	2.975	6.334	10.11	3.933	1.09205	2.31902e-05	-1.36251	1.09745e-10
WBGene00007375	C06C3.4	protein_coding	372.237	12.929	11.05	8.492	19.802	-0.233654	0.433399	1.22152	1.17786e-10
WBGene00020527	T15B7.15	protein_coding	179.19	3.823	4.894	3.574	8.421	0.357647	0.21758	1.23611	1.52667e-10
WBGene00012492	fbxb-7	protein_coding	166.715	5.37	5.108	3.329	8.616	-0.0660439	0.870658	1.36882	1.85149e-10
WBGene00016309	sdz-4	protein_coding	221.851	11.661	8.848	2.23	6.355	-0.406178	0.193697	1.50792	2.15488e-10
WBGene00011028	R05D7.3	protein_coding	153.262	3.318	2.687	6.328	2.75	-0.298471	0.315914	-1.20148	2.26476e-10
WBGene00006616	trp-4	protein_coding	314.696	0.888	0.86	4.106	1.515	-0.0366163	0.938797	-1.43481	2.35451e-10
WBGene00012953	fbxa-216	protein_coding	237.296	5.436	6.666	3.453	8.951	0.294401	0.371554	1.3704	2.4959e-10
WBGene00008102	C44H9.7	protein_coding	383.115	15.53	13.043	5.538	13.498	-0.256911	0.398043	1.2817	2.7763e-10
WBGene00077537	Y47H10A.6	pseudogene	498.656	34.632	48.27	33.829	69.458	0.47665	0.0307972	1.03687	3.05354e-10
WBGene00044638	F23A7.8	protein_coding	4413.08	416.585	839.733	431.562	1011.09	1.01065	1.09885e-05	1.22846	3.48928e-10
WBGene00009698	F44F1.6	protein_coding	387.24	11.794	10.936	2.57	7.972	-0.111449	0.809442	1.63179	3.83028e-10
WBGene00009964	fip-6	protein_coding	492.234	30.19	29.103	35.783	82.916	-0.0649259	0.862764	1.21188	4.0058e-10
WBGene00021966	Y57G7A.2	protein_coding	162.96	11.645	12.351	4.479	15.074	0.0837292	0.870565	1.7437	5.99302e-10
WBGene00004820	skr-14	protein_coding	560.618	49.231	44.087	11.564	34.571	-0.160774	0.712559	1.58008	6.74087e-10
WBGene00007509	C10C5.5	protein_coding	341.3	9.453	12.546	5.575	13.218	0.410106	0.146479	1.24478	7.02969e-10
WBGene00021204	fbxb-77	protein_coding	158.631	4.411	5.222	1.438	5.287	0.240955	0.619657	1.86598	8.28981e-10
WBGene00016056	C24D10.5	protein_coding	310.718	9.923	12.433	6.319	14.552	0.325597	0.253529	1.20077	8.28981e-10
WBGene00012915	lgc-35	protein_coding	209.087	3.808	4.041	7.14	3.361	0.0831345	0.801788	-1.08394	8.28981e-10
WBGene00044066	fbxb-66	protein_coding	542.314	19.083	21.739	8.157	22.602	0.187472	0.638852	1.46809	8.99022e-10
WBGene00219849	C36C9.10	ncRNA	441.127	91.892	127.451	73.825	167.763	0.468156	0.0782932	1.18481	9.109e-10
WBGene00044725	R11G1.7	protein_coding	329.047	36.528	31.831	17.661	40.186	-0.199139	0.517514	1.18595	1.02951e-09
WBGene00012594	nspe-5	protein_coding	250.756	21.485	29.084	26.313	12.421	0.433147	0.0580678	-1.07789	1.14426e-09
WBGene00194683	T20G5.15	pseudogene	98.7639	3.89	4.294	2.08	5.712	0.142746	0.722022	1.45307	1.1924e-09
WBGene00017143	EEED8.15	protein_coding	913.05	32.475	33.036	10.114	26.151	0.0234139	0.959098	1.36912	1.30657e-09
WBGene00016578	sdz-5	protein_coding	335.369	11.659	10.575	5.584	14.674	-0.144239	0.715583	1.38995	1.35692e-09
WBGene00011267	fbxb-85	protein_coding	111.337	3.909	5.504	1.316	5.383	0.488221	0.302443	2.04317	1.35692e-09
WBGene00219313	C17E4.20	protein_coding	2625.81	71.407	64.45	29.486	63.429	-0.148177	0.62858	1.10484	1.57315e-09
WBGene00008838	F15A4.2	protein_coding	251.748	12.495	9.784	3.807	10.55	-0.359181	0.306492	1.4729	1.58976e-09
WBGene00012851	Y44A6C.2	protein_coding	142.854	5.289	5.436	1.191	4.285	0.0383749	0.946366	1.84505	2.27568e-09
WBGene00045291	F23D12.10	protein_coding	132.102	2.539	2.894	1.161	3.495	0.179529	0.683107	1.5978	2.33224e-09
WBGene00044512	W03F9.11	protein_coding	198.846	5.424	5.418	9.406	4.133	0.00462342	0.99181	-1.17965	2.38566e-09
WBGene00015229	fbxa-125	protein_coding	64.0213	0.767	1.134	1.876	6.203	0.528378	0.351162	1.72206	2.94347e-09
WBGene00019927	fbxc-24	protein_coding	281.272	12.22	11.038	2.445	8.338	-0.149596	0.772132	1.76604	3.94491e-09
WBGene00007166	fbxa-152	protein_coding	232.962	6.077	5.292	11.98	5.659	-0.200961	0.51267	-1.08248	4.22631e-09
WBGene00077531	F40G9.15	protein_coding	55.1786	1.822	2.213	1.261	4.81	0.289574	0.59916	1.92141	4.26131e-09
WBGene00009213	thn-1	protein_coding	464.431	18.08	18.563	38.846	17.659	0.0407923	0.915324	-1.13492	5.17701e-09
WBGene00008267	C53A5.9	protein_coding	81.3576	0.967	2.137	1.1	3.466	1.13705	0.00215156	1.65874	5.85304e-09
WBGene00020537	fbxb-37	protein_coding	289.1	13.038	11.679	3.273	9.519	-0.161478	0.71368	1.53876	5.92745e-09
WBGene00044262	Y95D11A.2	pseudogene	342.444	8.223	10.349	9.412	19.673	0.330554	0.231031	1.06353	7.01701e-09
WBGene00017140	EEED8.12	protein_coding	164.213	12.654	9.992	2.58	9.278	-0.346134	0.46164	1.84717	7.23411e-09
WBGene00000641	col-65	protein_coding	844.992	19.557	12.396	54.675	26.068	-0.657158	0.00674148	-1.06942	1.0405e-08
WBGene00021458	Y39G10AL.1	protein_coding	316.072	13.781	12.451	3.331	9.401	-0.149928	0.734121	1.49339	1.26863e-08
WBGene00009963	fipr-26	protein_coding	83.3443	9.631	6.885	5.061	18.463	-0.512506	0.295693	1.8707	1.26863e-08
WBGene00007543	fipr-7	protein_coding	341.388	42.442	31.556	57.65	27.519	-0.431834	0.100281	-1.07043	1.74264e-08
WBGene00010100	F55C9.3	protein_coding	78.5404	2.93	5.872	2.081	6.803	0.983928	0.00901205	1.70712	1.74264e-08
WBGene00016250	hsp-110	protein_coding	5906.21	42.831	61.176	135.472	62.221	0.514796	0.0543182	-1.12227	1.74264e-08
WBGene00000675	col-101	protein_coding	4944.69	60.863	238.741	95.992	213.434	1.97206	2.66993e-19	1.15275	1.77046e-08
WBGene00010219	F57G9.3	protein_coding	75.1243	4.501	4.661	0.822	3.379	0.0490034	0.934113	2.02848	1.78485e-08
WBGene00045498	F56F4.8	protein_coding	202.077	8.71	6.896	2.433	7.532	-0.342104	0.422405	1.62028	1.79657e-08
WBGene00018358	erp-44.3	protein_coding	127.44	4.354	3.917	1.593	4.447	-0.151049	0.724803	1.47063	1.84517e-08
WBGene00021199	Y17G9B.2	protein_coding	203.343	37.355	38.283	12.232	32.555	0.0276677	0.953393	1.40986	1.90447e-08
WBGene00044371	ZC239.20	protein_coding	60.485	5.62	4.153	1.457	5.902	-0.434303	0.38222	2.02846	1.90447e-08
WBGene00007863	C32C4.3	protein_coding	73.4301	2.278	2.694	0.855	2.65	0.235845	0.58472	1.63272	1.91563e-08
WBGene00003889	osm-9	protein_coding	132.046	1.25	1.445	2.77	1	0.21058	0.631937	-1.4603	1.93463e-08
WBGene00014144	ZK899.6	protein_coding	71.7273	2.816	1.914	0.75	2.873	-0.561523	0.22349	1.93864	2.15135e-08
WBGene00004819	skr-13	protein_coding	371.72	35.69	30.432	6.431	19.459	-0.232151	0.611662	1.59693	2.43831e-08
WBGene00007537	fipr-8	protein_coding	472.361	55.917	28.982	51.342	24.092	-0.956267	2.33524e-05	-1.08953	2.45052e-08
WBGene00011508	T05H10.3	protein_coding	3569.88	292.779	240.933	103.593	213.663	-0.281726	0.31475	1.04421	2.56556e-08
WBGene00004827	skr-21	protein_coding	1890.96	101.417	90.373	40.848	90.384	-0.167083	0.625873	1.14528	2.85752e-08
WBGene00021725	bath-9	protein_coding	412.356	19.456	18.335	7.353	16.247	-0.0868006	0.812606	1.14187	2.85752e-08
WBGene00012240	W04A8.5	protein_coding	270.991	13.277	9.742	3.904	10.854	-0.450437	0.226895	1.47216	2.97458e-08
WBGene00020542	fbxb-82	protein_coding	104.717	3.272	2.805	2.087	6.06	-0.211855	0.656231	1.5286	4.73212e-08
WBGene00009410	F35E2.2	protein_coding	42.6628	2.488	1.669	0.582	2.975	-0.576836	0.316784	2.34396	5.47338e-08
WBGene00008138	C47D12.4	protein_coding	196.394	11.708	9.476	2.569	7.09	-0.305388	0.425359	1.45744	5.49817e-08
WBGene00010234	ttr-50	protein_coding	6925.3	352.313	378.227	82.463	302.212	0.102314	0.87534	1.87367	5.81842e-08
WBGene00009697	F44F1.5	pseudogene	276.702	7.662	6.506	2.271	5.95	-0.238542	0.556552	1.38857	7.9346e-08
WBGene00000499	chk-2	protein_coding	187.072	2.339	3.063	2.594	6.078	0.399086	0.253329	1.23542	8.26283e-08
WBGene00045511	F11A5.18	protein_coding	53.8505	2.255	4.232	1.91	6.481	0.903048	0.0389955	1.75324	8.501e-08
WBGene00006544	tbx-7	protein_coding	71.8446	3.128	2.617	0.699	3.474	-0.267079	0.692767	2.28654	8.62406e-08
WBGene00077441	C43D7.10	pseudogene	60.3362	3.544	3.851	0.574	2.648	0.116115	0.852223	2.193	9.12364e-08
WBGene00007544	fipr-6	protein_coding	419.109	61.4	40.35	62.578	30.793	-0.611049	0.0116505	-1.02424	1.04572e-07
WBGene00016230	C29G2.2	pseudogene	168.897	7.442	9.135	3.464	7.771	0.299304	0.335427	1.1662	1.14482e-07
WBGene00007608	C15C8.6	protein_coding	133.967	4.814	3.814	7.739	3.388	-0.346346	0.304525	-1.18545	1.31071e-07
WBGene00015408	C03H5.6	protein_coding	173.16	4.118	3.379	6.503	3.065	-0.281658	0.369678	-1.07919	1.33919e-07
WBGene00010158	pes-2.2	protein_coding	89.2652	5.314	4.475	0.67	3.114	-0.251587	0.690754	2.21294	1.5905e-07
WBGene00003567	ncx-2	protein_coding	1369.91	12.467	8.566	20.638	9.821	-0.54049	0.0479585	-1.07017	1.82687e-07
WBGene00010033	F54B11.10	protein_coding	313.115	24.114	15.423	14.973	30.026	-0.645004	0.00806768	1.0023	1.99493e-07
WBGene00195189	ZC449.8	protein_coding	115.516	6.872	8.449	4.235	10.044	0.289606	0.418181	1.24627	2.05817e-07
WBGene00003176	mec-14	protein_coding	161.066	2.269	2.9	6.318	2.787	0.354259	0.322014	-1.1814	2.0997e-07
WBGene00018109	fbxb-12	pseudogene	57.8713	3.815	2.719	0.686	2.863	-0.494588	0.340289	2.07617	2.11399e-07
WBGene00020204	T04B8.2	pseudogene	169.286	7.126	6.504	1.717	5.211	-0.13622	0.79479	1.60169	2.13667e-07
WBGene00000284	cah-6	protein_coding	323.805	8.281	6.67	13.096	6.488	-0.302412	0.302261	-1.01135	2.27665e-07
WBGene00019921	fbxc-34	protein_coding	104.42	4.885	5.398	1.134	4.609	0.136323	0.840053	2.02985	2.47395e-07
WBGene00020944	W02D7.9	ncRNA	36.7264	3.413	4.987	2.41	10.649	0.528944	0.408606	2.13818	2.66587e-07
WBGene00008784	F14B6.3	protein_coding	219.036	8.857	8.277	2.067	5.686	-0.0996781	0.839214	1.45182	2.71574e-07
WBGene00007933	C34E7.3	protein_coding	133.433	5.394	3.629	10.915	4.65	-0.580005	0.0883109	-1.22245	2.79306e-07
WBGene00019956	fbxb-75	protein_coding	144.977	7.113	5.754	1.534	4.054	-0.307069	0.416361	1.40345	3.24065e-07
WBGene00017462	F14D2.14	protein_coding	128.73	5.472	6.479	5.456	11.671	0.24783	0.47945	1.09205	3.25644e-07
WBGene00022063	nlp-81	protein_coding	160.152	5.847	3.679	14.621	6.812	-0.647138	0.0352622	-1.09951	3.30343e-07
WBGene00012603	nspe-6	protein_coding	162.58	19.065	43.986	28.015	11.729	1.20419	7.16423e-06	-1.25306	3.33221e-07
WBGene00016337	fbxb-38	protein_coding	72.19	4.248	2.959	0.873	3.28	-0.52164	0.302564	1.93306	3.62385e-07
WBGene00014065	ZK673.11	protein_coding	173.869	4.579	3.52	9.178	4.421	-0.367779	0.246134	-1.0534	4.26336e-07
WBGene00016455	C35E7.3	protein_coding	188.793	6.016	5.739	1.894	5.154	-0.0709322	0.89004	1.43988	4.33278e-07
WBGene00003845	odd-1	protein_coding	100.396	3.722	3.61	1.391	3.915	-0.0468668	0.930878	1.48957	4.98194e-07
WBGene00016886	fbxb-96	protein_coding	61.3326	3.804	3.175	0.49	2.578	-0.265588	0.706008	2.38237	5.46459e-07
WBGene00020688	T22D1.11	protein_coding	266.557	7.065	6.381	2.521	5.109	-0.152484	0.633901	1.02225	5.82676e-07
WBGene00044567	C46C11.4	protein_coding	159.173	7.78	6.696	1.164	3.444	-0.220542	0.630461	1.55297	5.89212e-07
WBGene00016546	C40A11.3	protein_coding	193.798	9.415	9.576	5.215	11.692	0.0257306	0.955128	1.16257	6.40666e-07
WBGene00003840	ocr-3	protein_coding	129.321	1.719	1.3	3.069	1.233	-0.413718	0.29664	-1.31094	6.9654e-07
WBGene00189995	C06E7.88	protein_coding	447.324	46.63	38.94	12.491	30.114	-0.26381	0.50429	1.26874	7.46936e-07
WBGene00014143	ZK899.5	protein_coding	48.054	2.963	1.74	0.531	2.572	-0.769139	0.181141	2.24428	7.9767e-07
WBGene00012593	nspe-7	protein_coding	89.0692	6.631	11.588	5.229	13.464	0.799556	0.0254176	1.37481	8.15843e-07
WBGene00021083	W08E12.2	protein_coding	29.9754	1.806	3.705	0.805	5.16	1.02106	0.142065	2.63216	9.11674e-07
WBGene00016175	C27H5.6	protein_coding	189.235	5.601	4.233	10.479	5.086	-0.404683	0.198994	-1.0435	9.57453e-07
WBGene00003717	nhr-127	protein_coding	346.083	9.79	6.366	4.015	8.725	-0.625304	0.0327345	1.11935	9.70405e-07
WBGene00045269	F46G11.6	protein_coding	166.595	12.893	10.74	4.333	9.622	-0.268871	0.425429	1.15133	1.12197e-06
WBGene00022866	ZK1240.1	protein_coding	97.2694	2.205	1.635	5.584	2.103	-0.439682	0.335501	-1.40468	1.14402e-06
WBGene00020434	T11F8.2	pseudogene	171.988	5.221	5.094	2.647	5.53	-0.0273896	0.947239	1.05649	1.25185e-06
WBGene00219728	linc-16	lincRNA	211.107	13.517	13.249	8.696	17.987	-0.0363602	0.929908	1.0428	1.32354e-06
WBGene00009537	ccch-2	protein_coding	60.7319	3.519	3.131	1.07	3.867	-0.171298	0.786216	1.84767	1.49702e-06
WBGene00219816	C14E2.12	snoRNA	403.294	97.234	110.987	64.629	152.957	0.186904	0.666405	1.24191	1.58858e-06
WBGene00000752	col-179	protein_coding	5657.69	111.636	332.924	133.754	225.402	1.5766	2.94435e-21	0.752903	1.86848e-06
WBGene00021557	Y45G5AM.5	protein_coding	216.63	20.473	20.894	6.536	15.188	0.0264988	0.955913	1.21508	1.88548e-06
WBGene00219327	ZK822.9	protein_coding	131.121	3.535	16.834	19.201	9.572	2.25277	2.96502e-17	-1.00361	1.92709e-06
WBGene00016927	nhr-172	protein_coding	44.8828	1.143	2.627	0.438	1.835	1.19339	0.0147711	2.08258	1.97623e-06
WBGene00006756	unc-17	protein_coding	149.547	2.451	1.704	4.834	2.086	-0.516119	0.162656	-1.20815	1.99616e-06
WBGene00007642	C17E4.2	protein_coding	355.877	18.794	17.077	7.515	17.245	-0.140299	0.744779	1.19614	2.02115e-06
WBGene00001673	gpa-11	protein_coding	98.2343	1.693	1.479	3.915	1.613	-0.170013	0.727859	-1.28124	2.06547e-06
WBGene00194835	Y17G9B.11	protein_coding	58.3864	7.317	7.667	2.797	11.354	0.0530086	0.947025	2.01881	2.09455e-06
WBGene00044694	fbxb-90	protein_coding	79.0283	3.856	3.831	0.751	2.413	-0.0168828	0.978046	1.66261	2.17905e-06
WBGene00044417	C08F1.11	protein_coding	170.798	7.32	9.333	2.609	6.413	0.3433	0.375562	1.29406	2.23047e-06
WBGene00017116	fbxb-78	protein_coding	129.396	6.313	5.022	2.417	5.257	-0.337861	0.29897	1.11414	2.61075e-06
WBGene00012297	W06D4.3	protein_coding	34.3807	0.664	1.438	0.629	2.665	1.11896	0.0693469	2.09237	2.63438e-06
WBGene00044197	fbxb-63	protein_coding	104.161	7.209	5.921	1.515	4.445	-0.288541	0.546186	1.55444	2.64835e-06
WBGene00015247	B0545.4	protein_coding	136.679	5.147	8.149	2.709	5.71	0.664909	0.0130535	1.07114	2.64835e-06
WBGene00013797	Y116A8C.20	protein_coding	30.77	2.487	1.601	0.633	2.739	-0.619355	0.284883	2.10875	2.70809e-06
WBGene00000461	ceh-40	protein_coding	160.199	7.314	6.944	2.288	5.664	-0.0819466	0.866443	1.31207	2.7233e-06
WBGene00000653	col-77	protein_coding	395.096	7.427	7.736	25.62	12.502	0.0600826	0.89002	-1.0357	2.77634e-06
WBGene00017481	F15B10.3	protein_coding	346.066	28.055	24.957	6.376	14.24	-0.172537	0.659299	1.15756	2.84185e-06
WBGene00021587	clec-76	protein_coding	960.141	29.726	10.734	28.806	15.502	-1.47502	1.04525e-12	-0.893107	2.99919e-06
WBGene00020541	fbxb-81	protein_coding	125.82	4.851	3.581	2.877	6.457	-0.43848	0.215487	1.15798	3.13415e-06
WBGene00009029	F21H7.3	protein_coding	195.313	15.553	11.431	5.777	12.864	-0.452872	0.176935	1.15147	3.19592e-06
WBGene00005241	srh-16	protein_coding	39.5405	1.386	0.997	0.76	2.516	-0.463573	0.413372	1.73047	3.33099e-06
WBGene00016177	C28C12.1	protein_coding	132.021	4.216	5.324	4.267	10.207	0.343473	0.424752	1.25733	4.3174e-06
WBGene00020081	sdz-29	pseudogene	140.606	7.546	6.67	1.908	5.095	-0.182487	0.71218	1.42681	4.41885e-06
WBGene00022111	Y71F9AL.6	protein_coding	107.366	5.559	5.717	2.154	5.749	0.0384593	0.94651	1.4031	4.65561e-06
WBGene00021625	Y47D7A.13	protein_coding	1014.56	13.283	12.276	72.486	34.11	-0.111502	0.799968	-1.08763	4.76216e-06
WBGene00013244	Y56A3A.33	protein_coding	93.8411	1.52	2.872	5.138	2.13	0.928126	0.0129642	-1.26758	4.90755e-06
WBGene00020834	T27A1.2	protein_coding	224.672	4.391	6.165	2.498	5.173	0.484947	0.112022	1.04697	5.02942e-06
WBGene00019577	lido-6	protein_coding	164.267	5.058	6.362	2.978	6.414	0.323699	0.355105	1.09796	5.11045e-06
WBGene00007521	C11E4.7	protein_coding	372.097	13.695	6.666	8.713	13.832	-1.03552	1.17977e-10	0.664248	5.13986e-06
WBGene00194658	R09E10.13	protein_coding	382.788	9.238	29.093	56.716	32.19	1.66046	9.66303e-15	-0.818281	5.43499e-06
WBGene00010149	F56D5.5	protein_coding	230.531	13.894	10.523	3.83	9.782	-0.401117	0.346353	1.34816	5.57954e-06
WBGene00021861	Y54F10BM.6	protein_coding	60.5912	4.49	3.99	0.824	2.803	-0.162912	0.780421	1.77042	5.62117e-06
WBGene00000597	col-8	protein_coding	6878.99	167.77	355.262	186.898	329.566	1.08255	7.41872e-08	0.818297	5.981e-06
WBGene00003099	lys-10	protein_coding	112.602	3.607	6.791	3.415	7.592	0.913076	0.00390039	1.15023	6.59294e-06
WBGene00016080	C24H12.11	pseudogene	84.492	3.271	2.859	1.304	3.093	-0.192965	0.652871	1.25255	7.02232e-06
WBGene00017296	F09E10.6	protein_coding	168.129	13.155	11.522	6.289	14.42	-0.193503	0.656528	1.19983	7.35764e-06
WBGene00017260	F08F3.1	protein_coding	138.732	6.12	4.366	8.27	3.998	-0.502157	0.11979	-1.04786	7.50832e-06
WBGene00000719	col-146	protein_coding	218.262	3.643	6.49	14.591	7.099	0.83805	0.00662056	-1.04017	7.75346e-06
WBGene00077443	Y71A12B.19	pseudogene	49.3872	2.196	2.007	1.542	4.278	-0.116117	0.848789	1.4623	7.75346e-06
WBGene00017365	F10G2.4	protein_coding	70.1963	5.569	5.846	1.418	3.909	0.0569042	0.915582	1.4724	8.31568e-06
WBGene00022557	fbxb-15	protein_coding	177.994	10.561	9.436	2.501	6.037	-0.16326	0.719232	1.27214	8.68843e-06
WBGene00010102	F55C9.5	protein_coding	88.932	9.685	9.515	4.88	11.499	-0.0398088	0.937596	1.23056	9.20155e-06
WBGene00020543	fbxb-83	protein_coding	218.022	6.854	5.927	4.668	10.585	-0.216379	0.62142	1.17627	9.75206e-06
WBGene00004154	pqn-72	protein_coding	153.52	1.714	1.9	4.867	2.234	0.160915	0.725842	-1.11715	1.00428e-05
WBGene00003959	pcp-4	protein_coding	256.369	2.251	1.616	5.101	2.483	-0.469596	0.168804	-1.03291	1.0182e-05
WBGene00009339	F32G8.3	protein_coding	62.5563	3.512	6.814	3.465	8.502	0.96409	0.0110707	1.29911	1.11743e-05
WBGene00019105	asp-8	protein_coding	476.476	13.859	5.545	23.307	12.146	-1.31585	7.24541e-08	-0.9373	1.18156e-05
WBGene00017538	ceh-49	protein_coding	346.247	13.045	14.577	5.617	11.532	0.157688	0.682051	1.03347	1.19342e-05
WBGene00013310	Y57G11C.14	protein_coding	120.945	4.454	4.911	3.289	8.182	0.141445	0.791603	1.30945	1.23324e-05
WBGene00003522	nas-3	protein_coding	226.804	5.899	1.779	7.548	13.407	-1.7569	1.15743e-13	0.828134	1.25139e-05
WBGene00000667	col-92	protein_coding	250.419	3.549	8.486	15.837	7.098	1.26496	9.3687e-05	-1.15821	1.27064e-05
WBGene00007515	C10C6.7	protein_coding	60.5681	3.047	2.243	1.738	4.883	-0.441963	0.38967	1.48367	1.42639e-05
WBGene00010105	fbxb-62	protein_coding	75.0707	4.276	3.813	1.266	3.742	-0.174466	0.76401	1.55482	1.48287e-05
WBGene00018606	F48E3.6	protein_coding	876.901	34.343	29.935	9.071	27.064	-0.19853	0.752958	1.57597	1.5061e-05
WBGene00044109	K02E11.10	protein_coding	114.409	0.664	0.104	8.34	3.565	-2.61406	5.3055e-05	-1.22575	1.55637e-05
WBGene00009836	fbxa-185	protein_coding	133.567	2.963	1.49	4.462	2.211	-0.997231	0.000659352	-1.01174	1.82957e-05
WBGene00013794	dct-13	protein_coding	71.4566	4.749	3.799	1.014	3.567	-0.335058	0.59775	1.81973	1.88379e-05
WBGene00019103	F59D6.1	protein_coding	160.061	9.879	5.575	11.666	5.776	-0.840215	0.0039779	-1.01229	2.02821e-05
WBGene00012916	Y46G5A.28	protein_coding	77.643	3.923	2.804	0.498	1.918	-0.492665	0.420454	1.93419	2.19364e-05
WBGene00006657	twk-2	protein_coding	299.446	1.895	1.791	3.671	1.797	-0.0844596	0.850291	-1.02579	2.23665e-05
WBGene00009754	F46A9.1	protein_coding	93.3128	2.043	3.069	1.775	4.342	0.578474	0.181577	1.29238	2.34071e-05
WBGene00019687	K12H6.7	protein_coding	143.555	6.295	6.612	1.921	4.362	0.067959	0.886945	1.17598	2.42972e-05
WBGene00008719	ttr-52	protein_coding	116.797	14.326	9.874	5.043	11.136	-0.541209	0.118517	1.13862	2.42972e-05
WBGene00018236	fbxb-71	protein_coding	76.9515	3.371	2.552	0.99	2.523	-0.409897	0.343009	1.35365	2.59924e-05
WBGene00000430	ceh-5	protein_coding	128.901	8.315	8.465	4.392	9.891	0.0240025	0.964681	1.17312	2.59924e-05
WBGene00043996	fbxb-87	protein_coding	73.7981	2.929	2.747	1.101	2.65	-0.0935239	0.851169	1.26511	2.66232e-05
WBGene00009020	F21D9.6	pseudogene	77.4723	3.264	3.813	1.194	3.018	0.213512	0.656505	1.33085	3.0413e-05
WBGene00000699	col-125	protein_coding	1672.81	21.118	21.338	143.129	54.562	0.0162211	0.980788	-1.39147	3.15789e-05
WBGene00013637	Y105C5A.13	protein_coding	373.96	38.927	22.976	53.91	25.406	-0.75941	0.0228957	-1.08614	3.1889e-05
WBGene00018065	F35F11.2	protein_coding	67.6196	3.053	3.611	1.809	4.418	0.224865	0.648421	1.28384	3.36413e-05
WBGene00017068	D2092.8	protein_coding	170.904	5.173	2.435	25.265	11.556	-1.076	0.00594917	-1.13266	3.53325e-05
WBGene00021894	Y54G2A.32	protein_coding	575.852	25.801	11.152	24.321	14.672	-1.21305	2.20477e-10	-0.727839	3.63401e-05
WBGene00016932	C54G6.3	protein_coding	83.5577	1.203	1.988	4.687	2.175	0.725864	0.0687083	-1.10393	3.69791e-05
WBGene00021259	glb-30	protein_coding	86.5493	3.457	3.286	5.533	2.542	-0.0637652	0.898884	-1.1163	3.70888e-05
WBGene00013328	Y57G11C.39	protein_coding	63.2021	5.322	3.612	1.564	4.18	-0.571926	0.193821	1.4166	3.71646e-05
WBGene00013757	fbxa-113	protein_coding	95.0987	2.566	3.599	2.631	5.526	0.48967	0.192854	1.06325	3.96471e-05
WBGene00015112	B0281.5	protein_coding	611.757	40.492	33.524	8.389	26.998	-0.272623	0.688748	1.68511	3.98118e-05
WBGene00000742	col-169	protein_coding	97.1115	2.328	2.619	6.106	2.933	0.181672	0.697097	-1.05761	4.1277e-05
WBGene00021505	Y41D4A.3	protein_coding	161.426	6.67	6.114	2.232	4.604	-0.131531	0.749083	1.0467	4.15689e-05
WBGene00011900	T21C12.4	protein_coding	47.7423	1.779	2.717	0.963	2.925	0.60697	0.258481	1.61425	4.37108e-05
WBGene00001070	dpy-8	protein_coding	746.452	6.312	0.352	38.638	21.771	-4.15006	3.65213e-41	-0.827247	4.68985e-05
WBGene00009837	fbxa-186	pseudogene	88.9268	2.235	2.871	1.95	0.761	0.357968	0.432034	-1.35161	4.70341e-05
WBGene00014946	Y70G10A.1	pseudogene	37.276	3.117	2.624	0.54	2.44	-0.257897	0.74401	2.1678	4.79223e-05
WBGene00019996	R10F2.5	protein_coding	53.6055	2.097	2.219	5.088	1.942	0.11448	0.858425	-1.3817	4.99224e-05
WBGene00008462	E02H4.4	protein_coding	215.105	6.83	3.059	6.642	3.939	-1.16678	1.30793e-08	-0.753282	5.11732e-05
WBGene00019035	fbxb-26	protein_coding	83.2634	4.704	4.031	0.743	2.168	-0.226418	0.675181	1.53658	5.24974e-05
WBGene00015610	C08F1.6	protein_coding	202.222	12.417	10.842	3.259	7.047	-0.201106	0.632793	1.11435	5.29684e-05
WBGene00001555	gcy-35	protein_coding	279.324	4.639	2.298	6.199	3.911	-1.01828	7.90074e-08	-0.663166	5.4905e-05
WBGene00015111	B0281.4	protein_coding	69.4961	3.38	4.088	2.018	4.789	0.277539	0.561178	1.24306	5.86079e-05
WBGene00016307	fbxc-18	protein_coding	163.996	7.035	5.945	1.34	3.719	-0.248222	0.660325	1.46176	5.93785e-05
WBGene00010760	K10H10.4	protein_coding	116.915	4.24	4.391	4.287	2.108	0.0495491	0.913401	-1.01757	6.41222e-05
WBGene00019576	lido-5	protein_coding	126.48	4.803	5.507	1.993	4.143	0.189967	0.632956	1.04367	7.15538e-05
WBGene00017000	D1005.6	protein_coding	48.1771	4.006	3.326	8.032	2.935	-0.294357	0.626421	-1.44055	7.26035e-05
WBGene00015386	C03B8.3	protein_coding	48.9197	1.581	2.684	1.163	2.995	0.764623	0.0872969	1.35506	7.2995e-05
WBGene00013408	fbxb-93	protein_coding	55.8432	3.029	3.313	0.686	2.072	0.127151	0.839347	1.60447	7.44858e-05
WBGene00013410	fbxb-94	pseudogene	56.3718	3.347	2.708	1.078	2.841	-0.309811	0.535562	1.38733	7.53108e-05
WBGene00019037	fbxb-17	protein_coding	130.657	6.984	5.681	2.043	4.706	-0.305294	0.484078	1.19589	7.61094e-05
WBGene00006886	vap-1	protein_coding	342.585	9.769	4.658	10.807	6.612	-1.0682	1.00329e-07	-0.706636	8.0634e-05
WBGene00077570	F55B12.11	pseudogene	69.081	2.807	2.873	1.095	2.686	0.0331011	0.95548	1.28819	8.45999e-05
WBGene00013592	Y81G3A.4	protein_coding	100.443	4.109	2.941	2.77	5.546	-0.48428	0.181512	1.01084	8.76146e-05
WBGene00014131	sdz-38	protein_coding	144.117	9.356	7.023	3.991	8.395	-0.413893	0.27237	1.06296	9.32677e-05
WBGene00013100	zip-7	protein_coding	151.628	8.883	10.869	2.375	6.599	0.284978	0.624303	1.47516	9.56696e-05
WBGene00001941	his-67	protein_coding	74.7496	6.319	7.849	5.68	2.513	0.302209	0.463218	-1.18115	9.58324e-05
WBGene00021690	Y48G8AL.12	protein_coding	285.45	10.919	3.886	67.561	31.832	-1.47303	6.65414e-05	-1.08615	9.82756e-05
WBGene00014047	clec-61	protein_coding	101.461	3.828	2.756	3.658	1.75	-0.482173	0.182038	-1.05388	0.000100567
WBGene00017014	dylt-2	protein_coding	155.164	18.338	15.11	8.638	18.954	-0.290269	0.515668	1.1363	0.000101569
WBGene00004397	rol-6	protein_coding	1505.53	17.903	1.358	99.762	57.269	-3.71988	5.1732e-51	-0.801171	0.000103792
WBGene00043049	F32H2.11	protein_coding	87.7394	3.401	2.405	1.745	3.88	-0.508385	0.211137	1.14312	0.00010447
WBGene00004815	skr-9	protein_coding	388.364	31.688	28.764	6.344	19.758	-0.140409	0.851524	1.63736	0.000107656
WBGene00001311	end-3	protein_coding	39.4554	1.932	2.159	0.833	2.848	0.152247	0.844857	1.75473	0.000118129
WBGene00020946	W02D7.11	protein_coding	215.981	15.935	27.079	52.594	22.568	0.768849	0.074757	-1.22116	0.00012685
WBGene00006217	str-173	protein_coding	61.2678	1.806	2.894	0.973	2.554	0.667353	0.156048	1.37723	0.000132255
WBGene00004813	skr-7	protein_coding	828.519	72.615	58.481	15.534	42.885	-0.313033	0.611991	1.46428	0.000137998
WBGene00194652	F15H9.8	pseudogene	72.5274	3.274	6.32	2.935	7.401	0.943568	0.0360629	1.32858	0.000145151
WBGene00235272	Y43B11AL.5	pseudogene	89.0278	4.014	3.209	1.152	2.54	-0.324991	0.420148	1.14151	0.000145487
WBGene00007182	fbxb-119	protein_coding	133.317	7.851	6.745	1.823	4.659	-0.227733	0.680571	1.35433	0.000148704
WBGene00017208	fbxb-35	protein_coding	106.324	5.549	5.284	1.503	3.362	-0.0743593	0.884754	1.16587	0.000156094
WBGene00206521	T02G5.15	protein_coding	70.1509	5.89	9.8	3.432	7.607	0.730886	0.0448408	1.14097	0.000160121
WBGene00194713	F19B10.13	protein_coding	650.081	10.193	168.506	11.127	19.854	4.04847	8.79795e-80	0.826986	0.00016095
WBGene00003977	pes-2.1	protein_coding	78.3101	4.052	4.035	0.833	2.784	-0.00851772	0.992671	1.73911	0.000162745
WBGene00019995	R10F2.4	protein_coding	74.3928	4.109	3.345	9.099	4.254	-0.289378	0.555381	-1.08944	0.000167124
WBGene00011018	R05A10.1	protein_coding	1296.97	54.701	26.737	62.15	38.555	-1.03453	3.5731e-07	-0.688058	0.000174745
WBGene00008634	F10A3.4	protein_coding	237.43	5.018	1.689	8.151	4.302	-1.56116	2.71111e-08	-0.916619	0.000181509
WBGene00206414	F31D5.7	protein_coding	49.0818	3.023	1.915	0.965	2.744	-0.671433	0.195328	1.48918	0.000181522
WBGene00012041	T26E3.8	protein_coding	70.174	3.845	3.364	0.644	2.155	-0.19552	0.786798	1.73037	0.000183707
WBGene00000680	col-106	protein_coding	29531.5	695.109	1826.9	762.12	1170.06	1.39409	7.51274e-16	0.618484	0.000185861
WBGene00009985	F53F4.1	protein_coding	122.082	13.255	13.86	22.773	10.94	0.0677815	0.897397	-1.05927	0.000189371
WBGene00001981	hnd-1	protein_coding	93.6931	6.531	4.942	1.104	3.62	-0.411267	0.536576	1.70255	0.000191297
WBGene00018754	F53C3.11	protein_coding	62.2172	2.61	1.589	0.555	1.334	-0.72019	0.0538121	1.26248	0.000191297
WBGene00016024	glb-7	protein_coding	80.4282	3.144	2.272	5.731	2.555	-0.461856	0.322014	-1.15611	0.000193001
WBGene00012202	W02B12.4	protein_coding	629.714	8.576	22.678	6.262	9.172	1.40365	1.1116e-21	0.550207	0.000197093
WBGene00001695	grd-6	protein_coding	74.7821	0.753	0.548	2.752	1.137	-0.44367	0.444375	-1.27677	0.000204168
WBGene00021519	Y41D4B.17	protein_coding	106.892	3.129	3.446	2.986	1.458	0.149823	0.737923	-1.04051	0.000204554
WBGene00017329	ugt-39	protein_coding	548.325	8.213	18.788	5.923	8.781	1.19416	9.60136e-15	0.565137	0.000214859
WBGene00009675	F44A6.3	protein_coding	26.1747	3.388	1.915	1.018	3.513	-0.804772	0.185623	1.76601	0.000218151
WBGene00007342	C05D12.5	protein_coding	137.751	8.366	6.725	3.919	8.359	-0.314507	0.470957	1.08306	0.000218151
WBGene00022743	mlt-7	protein_coding	828.557	13.871	6.857	14.064	9.917	-1.01349	4.01465e-12	-0.504178	0.000218331
WBGene00013043	arrd-16	protein_coding	80.2876	1.754	2.144	3.066	1.516	0.277265	0.519187	-1.01104	0.000219745
WBGene00018170	nspb-1	protein_coding	42.7268	4.594	2.725	7.555	3.013	-0.73615	0.150656	-1.33406	0.000234341
WBGene00044564	ZK813.6	protein_coding	120.816	8.78	6.59	2.825	5.777	-0.417777	0.255875	1.02569	0.000237087
WBGene00018824	F54E2.2	protein_coding	73.0411	5.311	5.664	1.909	4.758	0.073744	0.903347	1.30919	0.000246948
WBGene00012247	W04E12.2	protein_coding	90.8335	4.911	4.352	1.668	3.609	-0.185105	0.683351	1.10088	0.000252885
WBGene00045379	C45B11.6	protein_coding	191.052	6.224	4.707	2.462	5.212	-0.41017	0.325704	1.07612	0.000261321
WBGene00012119	T28C6.3	protein_coding	125.269	8.237	8.132	3.075	6.734	-0.0257916	0.964163	1.12168	0.000278653
WBGene00021130	W10D9.2	pseudogene	85.6106	4.109	5.048	1.545	3.596	0.289034	0.549527	1.2094	0.000279173
WBGene00008128	srab-12	protein_coding	83.7429	2.679	1.751	4.747	2.309	-0.603727	0.142065	-1.0311	0.000344106
WBGene00011599	T07G12.8	pseudogene	397.89	15.068	47.633	15.955	23.578	1.66164	2.02124e-25	0.565345	0.000359129
WBGene00009242	sre-6	protein_coding	335.506	15.136	4.797	15.311	9.931	-1.66406	1.2881e-18	-0.624647	0.000382505
WBGene00044520	F59A7.12	protein_coding	50.5678	5.381	8.078	5.252	11.91	0.581011	0.227629	1.17967	0.000412507
WBGene00013853	ZC116.1	protein_coding	160.088	10.115	4.19	6.882	4.098	-1.27087	1.11614e-08	-0.750292	0.00042523
WBGene00021162	Y5H2A.1	protein_coding	25.8083	2.869	0.776	0.877	3.111	-1.88906	0.00243458	1.82661	0.000441067
WBGene00206482	B0416.10	protein_coding	73.6995	3.805	4.52	1.966	4.146	0.233134	0.613176	1.06666	0.00047908
WBGene00044242	C54C8.12	protein_coding	117.006	38.685	7.209	12.993	6.776	-2.44611	2.27883e-21	-0.936485	0.000488808
WBGene00019484	K07D4.4	protein_coding	59.4426	3.003	1.515	8.743	3.715	-0.971677	0.0620357	-1.22743	0.000517284
WBGene00016919	C54E4.4	protein_coding	92.4674	5.494	3.487	4.723	2.221	-0.666243	0.0937152	-1.0865	0.00053074
WBGene00022112	Y71F9AL.7	protein_coding	195.025	9.064	10.938	3.178	7.339	0.265821	0.622195	1.20425	0.000547048
WBGene00007887	gadr-2	protein_coding	111.49	2.69	2.14	0.782	1.744	-0.331488	0.485753	1.15161	0.000569892
WBGene00000608	col-19	protein_coding	10767.9	163.563	438.895	213.961	351.126	1.42414	9.31088e-11	0.714669	0.000573751
WBGene00006513	rimb-1	protein_coding	553.073	2.36	8.695	5.07	3.053	1.88288	1.00621e-17	-0.729285	0.000580647
WBGene00013230	fbxb-22	protein_coding	68.423	4.648	3.154	0.973	2.504	-0.56045	0.257001	1.34918	0.000585328
WBGene00012490	Y19D2B.2	protein_coding	49.1811	4.126	3.843	1.793	4.54	-0.106874	0.874352	1.33446	0.000720568
WBGene00016211	sdz-3	pseudogene	91.8066	2.144	2.949	3.228	1.56	0.457314	0.292221	-1.04863	0.000724683
WBGene00020354	sgnh-1	protein_coding	57.7095	3.843	3.593	1.205	3.45	-0.0945827	0.901558	1.51555	0.000748953
WBGene00044733	W08F4.13	protein_coding	60.6498	3.158	2.515	0.799	2.01	-0.327302	0.549031	1.31981	0.000751151
WBGene00044137	F28H6.8	protein_coding	50.2633	3.347	5.212	2.888	6.468	0.628206	0.193664	1.17536	0.000764735
WBGene00015692	ugt-25	protein_coding	942.982	40.684	17.459	12.204	17.885	-1.22346	2.74411e-13	0.550329	0.000813427
WBGene00000753	col-180	protein_coding	102.139	1.322	1.402	7.84	3.686	0.0895872	0.896632	-1.09086	0.000813768
WBGene00019413	fbxb-50	protein_coding	63.6697	3.404	2.884	1.032	2.396	-0.239706	0.653733	1.22065	0.000850176
WBGene00005346	srh-129	protein_coding	64.1421	1.703	2.669	3.151	1.45	0.643859	0.163043	-1.13436	0.00086422
WBGene00017598	F19F10.1	protein_coding	55.5797	4.439	3.717	1.087	2.619	-0.258359	0.619357	1.2567	0.000873957
WBGene00077756	Y11D7A.19	protein_coding	56.5935	3.988	3.112	1.4	3.476	-0.36736	0.519066	1.3114	0.000933924
WBGene00015790	C15C7.4	protein_coding	128.128	4.979	1.809	6.354	3.177	-1.45178	3.21123e-05	-0.995936	0.000962667
WBGene00009510	F37D6.4	protein_coding	87.9216	5.701	4.319	2.49	5.015	-0.390746	0.351603	1.00226	0.000994062
WBGene00011362	cest-1	protein_coding	2881.06	64.119	22.292	50.263	65.451	-1.5233	1.90843e-38	0.380632	0.001118
WBGene00019704	fbxb-40	protein_coding	88.7642	4.285	4.422	1.247	2.724	0.0392314	0.946574	1.10789	0.00113659
WBGene00018643	drd-50	protein_coding	103.921	1.629	4.142	2.716	6.252	1.3615	0.00311875	1.2026	0.0011924
WBGene00019039	fbxb-18	protein_coding	64.1435	3.519	3.72	0.93	2.245	0.080091	0.897451	1.26224	0.00122248
WBGene00000716	col-143	protein_coding	8437.6	135.114	389.413	237.834	376.298	1.52728	1.27373e-12	0.661962	0.00136235
WBGene00044768	M117.7	pseudogene	66.5515	3.313	2.823	1.312	2.94	-0.226144	0.687162	1.17071	0.00139468
WBGene00001065	dpy-3	protein_coding	594.947	10.687	4.775	42.397	27.229	-1.14509	1.69657e-06	-0.638569	0.00145195
WBGene00009024	F21G4.3	protein_coding	55.5498	2.218	1.503	1.213	2.636	-0.553459	0.249432	1.10995	0.00148199
WBGene00015911	C17F4.3	protein_coding	202.442	3.804	1.566	17.252	10.726	-1.32248	1.22157e-05	-0.684894	0.00150495
WBGene00194939	C01B9.5	pseudogene	47.4118	3.69	4.327	2.333	5.07	0.236483	0.673913	1.13393	0.001619
WBGene00010101	fbxb-57	protein_coding	56.0259	3.009	2.95	0.781	1.94	-0.0392127	0.955913	1.31931	0.00162422
WBGene00018067	npr-7	protein_coding	94.4813	1.366	5.262	1.916	0.987	1.95457	3.62941e-11	-0.95986	0.0017269
WBGene00009902	drd-1	protein_coding	1047.75	25.67	60.051	11.537	17.76	1.22632	1.79833e-09	0.62115	0.00178238
WBGene00017216	F07F6.2	protein_coding	114.045	3.15	6.874	2.807	4.999	1.12162	0.000137822	0.827132	0.0018084
WBGene00007244	C01G12.3	protein_coding	138.164	7.922	8.38	3.146	6.428	0.0777084	0.891148	1.02473	0.0018084
WBGene00007507	C10C5.3	protein_coding	447.436	6.773	19.237	6.927	11.65	1.50625	2.75161e-09	0.748847	0.00186912
WBGene00003723	nhr-133	protein_coding	587.363	11.012	23.795	16.242	12.212	1.10996	2.61715e-16	-0.412125	0.00198065
WBGene00011979	T24B8.5	protein_coding	964.592	42.043	65.55	57.181	149.533	0.641313	0.319313	1.38667	0.00205798
WBGene00008285	C53D6.8	protein_coding	40.5213	4.073	3.031	1.119	2.908	-0.442179	0.452218	1.36034	0.00217097
WBGene00016076	C24H12.7	pseudogene	136.748	10.861	8.598	3.487	7.196	-0.339884	0.483186	1.03525	0.0022222
WBGene00019273	H43E16.1	protein_coding	218.574	2.789	1.378	2.797	1.676	-1.01134	0.000208742	-0.732393	0.00227393
WBGene00001104	dsl-2	protein_coding	280.125	15.668	14.294	3.747	7.538	-0.136303	0.803998	1.00713	0.00228061
WBGene00050914	T12B5.15	protein_coding	2850.41	135.717	523.194	255.042	353.959	1.9461	2.03549e-36	0.473135	0.00230656
WBGene00017961	nhr-180	protein_coding	333.984	5.041	16.482	9.402	6.425	1.70752	6.4851e-21	-0.545512	0.00232461
WBGene00010120	dot-1.4	protein_coding	86.4308	4.873	3.32	1.015	2.297	-0.556711	0.248455	1.16534	0.00241469
WBGene00012231	W04A4.2	protein_coding	336.969	6.049	15.844	4.198	6.319	1.38783	2.46818e-13	0.586677	0.00242137
WBGene00012793	Y43D4A.7	pseudogene	36.7905	2.451	2.522	5.042	2.256	0.0393183	0.959148	-1.16837	0.00245503
WBGene00003983	pes-10	protein_coding	162.271	7.098	5.558	1.461	3.048	-0.354491	0.468531	1.0574	0.00262202
WBGene00015714	C12D12.3	protein_coding	163.09	8.307	17.116	5.601	9.226	1.03776	5.13718e-05	0.726123	0.00278346
WBGene00235351	C32B5.18	protein_coding	32.7241	3.907	6.134	1.364	5.288	0.644908	0.482933	1.96818	0.00281243
WBGene00008220	C50B6.7	protein_coding	1640.92	24.591	10.788	40.368	30.405	-1.18667	9.43899e-17	-0.408945	0.00281781
WBGene00017251	fbxb-105	protein_coding	70.323	3.377	3.009	0.822	2.164	-0.173484	0.81471	1.37472	0.00282722
WBGene00000618	col-41	protein_coding	1154.41	6.952	0.587	70.938	34.24	-3.57976	1.74864e-18	-1.05085	0.00284674
WBGene00044038	C47G2.6	pseudogene	28.5295	2.059	1.803	1.645	4.254	-0.174673	0.83229	1.35284	0.00291692
WBGene00284852	M04F3.7	lincRNA	185.502	24.261	32.486	19.503	38.978	0.423353	0.384597	1.0012	0.00299909
WBGene00045043	Y116A8C.48	ncRNA	49.0459	3.321	5.422	3.106	6.905	0.69972	0.191415	1.15099	0.00310976
WBGene00269431	T16A1.10	protein_coding	48.8049	3.849	6.346	4.164	9.163	0.710873	0.189296	1.13875	0.00322598
WBGene00000670	col-95	protein_coding	6763.75	84.96	274.832	175.405	260.303	1.69394	7.60632e-18	0.569531	0.00333304
WBGene00045406	D1086.19	protein_coding	26.2261	3.375	3.846	0.878	2.782	0.164594	0.846151	1.65694	0.00344998
WBGene00000609	col-20	protein_coding	13260.9	200.3	712.525	318.137	487.921	1.83086	1.00621e-17	0.617008	0.00345759
WBGene00000754	col-181	protein_coding	22534.2	423.778	1221.83	502.758	702.896	1.52771	6.18024e-20	0.483449	0.00360112
WBGene00008596	clec-54	protein_coding	887.519	27.888	10.957	26.751	35.51	-1.35648	1.66421e-20	0.407758	0.00368826
WBGene00010752	K10G4.3	protein_coding	219.552	7.114	15.535	16.165	10.877	1.12985	2.62399e-07	-0.570682	0.00377763
WBGene00022838	ZK993.2	protein_coding	65.2116	1.668	0.938	2.542	1.246	-0.829658	0.0758332	-1.01501	0.00401773
WBGene00008593	clec-227	protein_coding	1025.81	33.54	16.285	32.995	42.163	-1.04455	7.72511e-16	0.352884	0.00456216
WBGene00017413	F13A2.4	protein_coding	45.4738	1.941	3.932	1.801	3.842	1.03312	0.029954	1.09684	0.00457114
WBGene00189950	C39B5.14	protein_coding	49.0274	1.285	1.317	2.577	1.233	0.0130337	0.98688	-1.0647	0.00465139
WBGene00016361	drd-10	protein_coding	50.4043	2.222	4.511	2.241	4.936	1.01724	0.0440643	1.13035	0.00467792
WBGene00077558	T06D10.3	protein_coding	71.0863	5.248	6.074	6.807	13.624	0.213982	0.730099	1.00598	0.00469368
WBGene00219416	F23H12.21	ncRNA	54.3306	5.125	5.96	3.693	7.429	0.196609	0.737216	1.01278	0.0048232
WBGene00012592	Y38E10A.14	protein_coding	425.114	6.336	28.065	6.853	9.665	2.14854	2.72256e-37	0.494462	0.00484057
WBGene00005002	spp-17	protein_coding	1777.63	92.772	210.92	151.044	207.16	1.18489	1.32381e-12	0.455486	0.00488774
WBGene00001103	dsl-1	protein_coding	87.3568	6.834	6.191	1.109	2.65	-0.153177	0.825292	1.25443	0.00525308
WBGene00022679	ZK180.5	protein_coding	1238.22	8.355	7.012	48.362	23.585	-0.253013	0.674734	-1.03586	0.00551924
WBGene00004965	spe-11	protein_coding	42.787	0.674	2.758	0.72	1.696	2.03633	3.4e-05	1.23503	0.00553706
WBGene00010876	M05D6.3	protein_coding	80.5435	0.85	4.625	1.985	1.007	2.45457	7.20151e-12	-0.966474	0.00559134
WBGene00050913	T12B5.14	protein_coding	161.576	6.746	18.434	13.06	20.749	1.44742	1.5807e-07	0.672835	0.00577928
WBGene00000693	col-119	protein_coding	45009.4	969.904	2226.65	1301.89	1811.86	1.19899	1.36947e-11	0.476864	0.00582717
WBGene00020869	T28A11.2	protein_coding	696.211	53.531	24.809	32.445	44.925	-1.10847	2.95377e-10	0.468354	0.0058509
WBGene00014069	ZK678.3	protein_coding	37.107	1.594	3.791	1.462	3.616	1.23208	0.0330997	1.29039	0.00599177
WBGene00045270	C04E7.5	protein_coding	39.2918	2.97	3.073	1.837	3.822	0.0568857	0.934113	1.06886	0.00621886
WBGene00020362	fbxb-10	protein_coding	51.9344	2.703	2.778	0.534	1.308	0.0229495	0.976029	1.27525	0.00627395
WBGene00011229	R11.4	protein_coding	108.815	18.433	15.41	4.435	8.924	-0.266294	0.611645	1.00013	0.00639349
WBGene00019272	H42K12.3	protein_coding	563.522	6.835	3.289	21.592	14.447	-1.04337	2.69195e-05	-0.580015	0.00652501
WBGene00014155	ZK930.5	protein_coding	43.8115	2.046	1.766	1.36	2.776	-0.221533	0.721855	1.04448	0.00655948
WBGene00019922	fbxc-28	protein_coding	117.167	5.231	4.759	1.272	2.554	-0.143517	0.805414	1.00154	0.00678466
WBGene00020624	T20D4.19	protein_coding	48.2075	5.931	4.675	1.975	4.511	-0.365466	0.55827	1.19578	0.00680574
WBGene00000696	col-122	protein_coding	26142.7	503.749	1576.13	662.319	953.01	1.64565	2.70702e-17	0.524983	0.00685316
WBGene00007240	C01G10.15	protein_coding	249.938	35.291	15.706	20.615	28.867	-1.16794	4.71968e-10	0.485951	0.00728926
WBGene00012398	Y6E2A.4	protein_coding	430.044	5.963	13.757	10.831	6.853	1.20482	6.57341e-06	-0.662511	0.00738356
WBGene00194794	F45B8.5	pseudogene	116.45	2.971	6.368	1.856	3.118	1.09766	0.000126126	0.739846	0.00768829
WBGene00012900	Y46G5A.8	protein_coding	170.89	10.839	12.499	4.421	11.918	0.204927	0.823436	1.42988	0.00777417
WBGene00013297	Y57G11B.5	protein_coding	10680.6	239.214	1084.51	308.786	389.904	2.1806	6.34775e-73	0.336456	0.0078946
WBGene00013130	Y52B11B.1	protein_coding	34.2033	1.858	0.1	9.59	4.085	-3.96849	0.000638261	-1.24114	0.00798728
WBGene00044372	ZC239.21	protein_coding	29.2531	3.812	2.781	0.814	2.425	-0.47277	0.545161	1.55147	0.00800213
WBGene00006927	vit-3	protein_coding	712.674	1.976	5.121	5.061	7.56	1.37759	4.4066e-09	0.580026	0.00834304
WBGene00001170	egl-1	protein_coding	47.8335	4.047	3.273	1.652	3.685	-0.332562	0.605431	1.14553	0.00887265
WBGene00014904	Y49E10.26	pseudogene	43.3644	1.481	1.877	1.231	2.553	0.339488	0.585204	1.04964	0.0089997
WBGene00007301	C04F12.7	protein_coding	134.17	3.75	11.579	3.979	7.255	1.62751	4.99109e-06	0.868447	0.00902669
WBGene00206514	R05G9.5	protein_coding	39.9942	2.451	1.853	3.853	1.804	-0.411005	0.518656	-1.08441	0.00958053
WBGene00000606	col-17	protein_coding	1895.33	17.229	1.511	141.75	73.398	-3.52514	1.83632e-19	-0.949614	0.0097592
WBGene00001956	hlh-12	protein_coding	34.8517	2.142	3.803	1.159	2.505	0.817983	0.102316	1.10757	0.0099964
WBGene00000757	col-184	protein_coding	18868.8	390.767	1041.1	493.831	674.508	1.41376	6.56368e-16	0.449835	0.0101732
WBGene00012256	lpr-5	protein_coding	934.479	10.555	3.892	27.043	18.973	-1.43075	1.5869e-11	-0.511432	0.0102777
WBGene00017270	numr-1	protein_coding	109.247	1.465	14.041	0.664	1.324	3.26345	2.10862e-27	1.00396	0.010282
WBGene00019908	R05H11.2	protein_coding	234.545	8.826	1.985	17.499	12.206	-2.15022	4.24766e-19	-0.520265	0.0104884
WBGene00013055	Y50E8A.12	protein_coding	46.5949	1.499	2.375	1.409	2.915	0.67262	0.233202	1.0578	0.0105783
WBGene00011844	T19C9.8	protein_coding	409.691	17.755	3.94	13.602	18.878	-2.17673	9.19517e-30	0.471369	0.0106643
WBGene00004114	pqn-25	protein_coding	80.2103	2.511	1.101	1.439	0.837	-1.18804	0.000171348	-0.779826	0.0108055
WBGene00017618	F20A1.6	protein_coding	536.884	35.007	17.433	16.088	21.263	-1.00534	1.98854e-10	0.401661	0.0109687
WBGene00001959	hlh-15	protein_coding	37.5828	3.767	3.694	2.306	4.686	-0.0247515	0.973246	1.01894	0.0110806
WBGene00219905	F19F10.13	ncRNA	32.2711	2.648	17.123	3.922	9.142	2.70984	6.76795e-07	1.22304	0.0113155
WBGene00015300	C01F1.5	protein_coding	129.426	2.107	1.035	5.726	3.744	-1.05546	0.00111922	-0.61393	0.0115871
WBGene00008354	gcsh-1	protein_coding	603.704	55.715	25.695	40.543	54.044	-1.12327	4.29842e-11	0.414158	0.0122098
WBGene00012648	Y39A1A.9	protein_coding	468.378	4.55	0.707	16.868	10.974	-2.65002	2.16475e-20	-0.618177	0.0125102
WBGene00022236	Y73B6BL.12	protein_coding	44.1115	2.37	2.944	1.974	3.95	0.334495	0.591795	1.00758	0.0128746
WBGene00020905	T28H11.7	protein_coding	38.4593	0.72	3.122	1.094	2.518	2.13155	0.000166482	1.20182	0.0131901
WBGene00010673	K08E7.5	protein_coding	190.546	1.137	0.523	3.062	2.011	-1.13434	0.00019259	-0.604577	0.0135659
WBGene00019040	fbxb-19	protein_coding	48.3343	3.079	2.714	0.769	1.632	-0.178556	0.772839	1.06473	0.0135755
WBGene00011215	R10E9.3	protein_coding	370.519	11.827	27.698	11.66	15.797	1.22286	3.45875e-12	0.435034	0.0138452
WBGene00005641	sro-1	protein_coding	71.4512	2.524	1.219	2.784	1.676	-1.03334	0.00373434	-0.736339	0.014935
WBGene00001725	grl-16	protein_coding	737.362	5.646	3.678	33.875	16.619	-0.619788	0.29494	-1.02751	0.0149878
WBGene00012038	T26E3.5	protein_coding	44.4514	3.225	2.425	0.713	1.664	-0.427741	0.514926	1.21497	0.0152085
WBGene00016523	C39B5.5	protein_coding	106.701	3.774	7.561	3.87	6.962	1.01014	0.0157525	0.851356	0.0154414
WBGene00010277	F58G6.7	protein_coding	356.125	25.642	10.933	12.155	16.457	-1.23788	5.10916e-12	0.436145	0.0156471
WBGene00270293	F36H5.17	protein_coding	32.1482	5.27	4.424	0.572	1.522	-0.259423	0.710155	1.4446	0.0158216
WBGene00001071	dpy-9	protein_coding	1191.43	20.331	1.161	75.842	56.348	-4.1157	6.48975e-75	-0.429175	0.0167187
WBGene00003856	odr-10	protein_coding	146.874	7.601	3.177	5.463	3.671	-1.25436	4.18315e-07	-0.571325	0.0173635
WBGene00008483	E04D5.4	protein_coding	197.142	23.288	5.493	6.745	12.053	-2.09458	5.4445e-09	0.838205	0.0174609
WBGene00016880	fbxb-95	protein_coding	42.5263	2.564	2.577	0.579	1.235	-0.0028212	0.996547	1.06506	0.0177838
WBGene00003591	nex-4	protein_coding	207.415	6.069	2.373	6.6	4.289	-1.36102	1.8318e-06	-0.624695	0.0179321
WBGene00014770	F54F3.2	pseudogene	721.307	9.568	41.342	12.666	16.34	2.11167	3.09625e-45	0.368832	0.0191434
WBGene00004398	rol-8	protein_coding	1031.3	9.304	1.023	73.768	39.085	-3.17688	7.75336e-14	-0.916563	0.0192911
WBGene00002103	ins-20	protein_coding	30.4046	0.715	2.675	1.848	4.334	1.9057	0.00683607	1.22073	0.0193801
WBGene00003448	msp-55	protein_coding	29.151	0.872	4.468	1.011	2.339	2.34823	4.39007e-05	1.22394	0.0200691
WBGene00019797	fbxb-31	protein_coding	53.3933	3.192	2.565	0.6	1.352	-0.318149	0.647146	1.18416	0.0204671
WBGene00000751	col-178	protein_coding	24280.4	511.402	1191.72	760.393	1034.12	1.22057	2.83598e-10	0.44359	0.0204901
WBGene00009484	F36G3.3	protein_coding	79.7939	6.714	3.254	6.876	4.225	-1.04369	0.00296333	-0.702634	0.0212589
WBGene00013480	egas-3	protein_coding	289.496	0.713	5.993	3.78	2.715	3.06737	1.09855e-41	-0.476925	0.0220613
WBGene00022086	sprr-3	protein_coding	108.348	2.059	5.241	2.215	1.378	1.34855	4.11194e-06	-0.680769	0.0230149
WBGene00044374	C17F4.12	protein_coding	74.0992	7.406	2.963	10.691	6.952	-1.30793	8.04526e-05	-0.625472	0.0233413
WBGene00045067	F07C6.6	protein_coding	28.9871	1.859	1.671	1.939	4.028	-0.17783	0.830933	1.04225	0.023546
WBGene00008295	nlp-39	protein_coding	885.964	254.85	97.585	87.993	59.716	-1.38909	2.72728e-08	-0.560595	0.0239016
WBGene00012378	W10G6.1	protein_coding	25.2946	2.788	3.524	2.429	5.099	0.329759	0.65531	1.05743	0.0243527
WBGene00000713	col-140	protein_coding	36410.8	678.686	1892.5	1089.69	1513.56	1.47951	1.72672e-12	0.474036	0.0244259
WBGene00005016	sqt-1	protein_coding	1297.09	16.478	1.289	97.894	53.441	-3.66085	4.29524e-19	-0.873411	0.0255693
WBGene00006843	unc-119	protein_coding	292.689	8.912	22.809	5.735	7.963	1.35356	5.87745e-12	0.469755	0.0256653
WBGene00011234	R11A5.6	protein_coding	46.9539	3.529	5.041	7.463	3.223	0.521066	0.514926	-1.21092	0.0256697
WBGene00010865	M04D8.7	protein_coding	127.119	11.353	4.612	10.717	7.428	-1.3207	2.22769e-07	-0.533346	0.0258574
WBGene00007407	C07B5.2	protein_coding	26.3615	1.599	1.401	1.149	2.561	-0.22617	0.791603	1.13851	0.026366
WBGene00008499	cyp-37A1	protein_coding	1156.92	17.226	36.011	28.391	21.65	1.06336	2.62022e-09	-0.390266	0.0266336
WBGene00003432	msp-36	protein_coding	45.4635	1.851	5.586	1.869	4.499	1.59544	0.018597	1.27228	0.026845
WBGene00003613	nhr-14	protein_coding	647.004	17.357	7.608	15.209	11.666	-1.19553	4.28425e-12	-0.380701	0.0268897
WBGene00019662	K11H12.6	protein_coding	34.5644	6.852	1.268	2.678	1.212	-2.45471	2.36723e-06	-1.16546	0.0271863
WBGene00021586	clec-75	protein_coding	64.831	3.251	2.571	1.498	0.704	-0.347537	0.608247	-1.08174	0.0280882
WBGene00016447	msd-4	protein_coding	112.26	4.954	13.152	6.132	11.243	1.41298	0.00183135	0.875764	0.0288302
WBGene00000729	col-156	protein_coding	46.5675	0.339	0.252	4.049	1.719	-0.378092	0.749369	-1.24219	0.0290479
WBGene00269378	C07G3.15	protein_coding	60.8268	2.971	1.31	3.409	2.122	-1.18385	0.00129868	-0.686405	0.0294788
WBGene00206474	T22A3.12	protein_coding	28.8212	1.214	2.026	1.296	2.671	0.735454	0.263506	1.03868	0.0294788
WBGene00005003	spp-18	protein_coding	6323.43	489.668	220.717	466.363	578.657	-1.14947	3.6973e-16	0.311061	0.0307241
WBGene00020770	eat-17	protein_coding	449.97	3.17	6.62	5.651	3.927	1.0648	3.95381e-05	-0.521623	0.0312702
WBGene00000020	abt-2	protein_coding	554.91	1.685	3.945	3.463	2.423	1.22809	8.17524e-07	-0.512368	0.0317245
WBGene00235263	Y66H1A.8	protein_coding	34.0298	4.416	11.855	3.699	7.708	1.40631	0.0118079	1.0625	0.032314
WBGene00009840	fbxa-189	protein_coding	621.285	9.211	21.336	8.19	10.4	1.21035	2.90974e-15	0.342215	0.0328861
WBGene00013508	Y71A12B.11	protein_coding	290.188	19.527	15.746	3.272	7.157	-0.311492	0.701047	1.1292	0.0332193
WBGene00020714	T23B3.6	protein_coding	346.959	12.647	5.682	11.36	8.675	-1.16476	3.17365e-10	-0.387813	0.0337769
WBGene00002111	ins-28	protein_coding	83.9531	15.054	7.215	5.626	8.71	-1.04862	0.000547124	0.62482	0.0345097
WBGene00004264	qua-1	protein_coding	1406.07	6.803	3.141	23.23	17.187	-1.10952	5.30646e-07	-0.434851	0.0358909
WBGene00000017	abf-6	protein_coding	750.213	57.064	28.036	32.97	41.682	-1.02965	1.31782e-10	0.338186	0.0363353
WBGene00017205	F07C4.12	protein_coding	2391.93	55.165	27.445	66.983	54.628	-1.00847	5.02551e-13	-0.294031	0.0363479
WBGene00000602	col-13	protein_coding	262.326	2.878	4.929	20.142	9.336	0.780538	0.2867	-1.11044	0.0365853
WBGene00007533	cbl-1	protein_coding	383.782	14.414	6.485	7.025	9.278	-1.15451	1.0979e-09	0.39947	0.0372117
WBGene00022713	ZK355.3	protein_coding	31.4599	1.818	2.315	2.514	1.177	0.361626	0.6432	-1.10574	0.0373233
WBGene00020735	T23F2.2	protein_coding	855.45	3.85	7.961	5.863	4.517	1.04876	9.00955e-09	-0.375151	0.0379628
WBGene00001557	gcy-37	protein_coding	133.625	2.248	0.596	3.247	2.246	-1.93272	1.66701e-11	-0.528671	0.038628
WBGene00021339	Y34F4.4	protein_coding	154.839	9.933	4.934	5.287	7.489	-1.00903	9.45722e-05	0.504613	0.0397015
WBGene00044183	F09C6.13	protein_coding	32.6232	8.13	8.184	1.476	3.279	0.0146444	0.986815	1.15359	0.0414832
WBGene00004120	pqn-32	protein_coding	487.863	5.267	2.599	15.908	10.777	-1.009	0.00158587	-0.560704	0.0420953
WBGene00008597	clec-55	protein_coding	246.228	9.956	4.032	7.727	9.897	-1.30413	1.14892e-12	0.358448	0.0449952
WBGene00008021	C39B10.1	protein_coding	263.113	7.583	3.158	5.697	4.173	-1.26435	2.77597e-08	-0.452537	0.0450712
WBGene00010633	nspd-2	protein_coding	138.355	8.576	23.53	9.355	16.441	1.4545	0.00113047	0.813703	0.0454066
WBGene00002119	ins-36	protein_coding	52.0555	3.46	7.392	2.798	4.903	1.09584	0.0195803	0.83325	0.0458813
WBGene00006539	tbb-6	protein_coding	390.987	19.282	9.306	6.536	8.398	-1.05186	1.45195e-09	0.362495	0.0490422
WBGene00018601	F48C1.9	protein_coding	40.0953	4.468	6.997	2.088	4.233	0.64307	0.320333	1.02149	0.049143
WBGene00005602	srj-14	protein_coding	420.161	11.845	5.381	6.187	8.022	-1.14104	1.07764e-09	0.370537	0.0515918
WBGene00044268	T27E7.10	pseudogene	36.4026	2.131	4.562	2.656	4.567	1.10786	0.0233493	0.77916	0.0534151
WBGene00019764	M03F8.5	protein_coding	264.965	6.664	3.087	6.427	4.976	-1.11133	1.34817e-08	-0.367363	0.0548828
WBGene00021254	Y22D7AL.16	protein_coding	103.988	5.492	1.811	6.638	4.428	-1.56626	2.35408e-06	-0.580215	0.0552947
WBGene00022680	ZK180.6	protein_coding	311.97	1.575	0.553	10.122	5.002	-1.49949	0.0210986	-1.01697	0.0569687
WBGene00021176	Y9C9A.1	protein_coding	57.8729	2.378	0.571	2.915	1.678	-2.14202	9.12759e-06	-0.799738	0.0605593
WBGene00019404	K05B2.4	protein_coding	114.917	1.844	3.795	3.653	2.608	1.04907	0.000274562	-0.487608	0.0613072
WBGene00017711	F22E5.13	protein_coding	301.993	5.098	14.505	9.784	7.6	1.50891	3.30232e-15	-0.363892	0.0623065
WBGene00020561	T19C3.3	protein_coding	300.599	19.858	8.908	40.078	30.916	-1.15851	2.54119e-07	-0.375389	0.0638595
WBGene00011680	T10B10.3	protein_coding	402.162	3.49	8.219	4.571	3.511	1.2382	3.76347e-10	-0.37681	0.0646397
WBGene00045265	K10C2.8	protein_coding	116.671	2.83	7.79	5.05	7.066	1.46203	2.2855e-07	0.483303	0.0659616
WBGene00008323	C55A1.6	protein_coding	145.268	10.824	24.583	7.71	11.641	1.17555	0.000396886	0.585601	0.0693577
WBGene00005017	sqt-2	protein_coding	1722.79	21.356	1.656	129.589	75.421	-3.68988	1.27455e-17	-0.780985	0.0695747
WBGene00018465	F45E1.4	protein_coding	491.73	11.256	23.126	17.633	14.061	1.03731	9.99521e-09	-0.329393	0.0696506
WBGene00022751	msrp-2	protein_coding	78.5201	4.692	11.118	4.217	7.452	1.24481	0.0150819	0.821848	0.070187
WBGene00015598	fbxa-163	protein_coding	126.437	2.347	8.525	2.124	1.456	1.85574	4.14518e-12	-0.555627	0.0710199
WBGene00018138	folt-2	protein_coding	867.233	12.857	32.285	12.411	16.073	1.33018	3.05944e-11	0.373674	0.0712373
WBGene00022754	nspd-1	protein_coding	142.332	7.872	22.306	10.5	16.432	1.50626	8.57121e-05	0.646463	0.0737151
WBGene00000698	col-124	protein_coding	4921.09	67.876	217.2	112.932	191.089	1.67815	0.000197665	0.75883	0.0750813
WBGene00000733	col-160	protein_coding	5127.77	95.047	202.736	190.57	145.164	1.09328	1.22183e-06	-0.392347	0.0773892
WBGene00017376	F11C7.2	protein_coding	276.397	22.311	10.457	25.43	20.19	-1.10575	1.40855e-08	-0.331721	0.0786464
WBGene00007009	wwp-1	protein_coding	3583.13	28.814	57.669	44.875	35.478	1.00142	3.26666e-07	-0.33847	0.0834436
WBGene00013673	Y105E8A.13	protein_coding	145.438	3.048	1.429	9.215	6.749	-1.10218	0.000994675	-0.453026	0.0848618
WBGene00001750	gst-2	protein_coding	131.181	10.714	4.837	8.301	5.973	-1.1565	4.41972e-05	-0.471273	0.0857397
WBGene00011070	msrp-7	protein_coding	45.751	5.038	2.356	3.643	2.34	-1.09877	0.00646709	-0.646307	0.0863279
WBGene00003539	nas-20	protein_coding	2246.49	26.831	72.897	63.426	74.763	1.44293	3.7783e-28	0.23751	0.0869798
WBGene00017453	F14D2.5	protein_coding	32.577	1.33	3.469	2.476	4.312	1.39316	0.0180221	0.796798	0.0900063
WBGene00021398	Y38C1AA.7	protein_coding	32.7185	0.918	3.416	1.028	2.124	1.90151	0.00598932	1.05129	0.0911585
WBGene00015355	C02F12.5	protein_coding	6841.19	500.168	172.368	425.374	372.566	-1.53727	1.11398e-49	-0.191324	0.0924832
WBGene00017267	numr-2	protein_coding	61.1531	0.748	7.973	0.371	0.676	3.41159	6.35054e-17	0.925588	0.0942696
WBGene00008014	fbxa-172	protein_coding	158.684	4.185	1.851	4.475	3.389	-1.18189	2.30334e-06	-0.396752	0.0950834
WBGene00002282	let-4	protein_coding	345.928	3.664	1.634	7.895	6.169	-1.16629	5.06845e-07	-0.355063	0.0956901
WBGene00003646	nhr-56	protein_coding	695.889	11.784	27.806	15.264	12.404	1.23557	5.10582e-13	-0.300128	0.0962717
WBGene00001770	gst-22	protein_coding	463.889	27.702	13.737	20.795	27.485	-1.01396	6.36369e-05	0.402072	0.0981785
WBGene00016942	C55B7.3	protein_coding	171.514	2.764	6.582	2.536	3.298	1.24999	1.47506e-08	0.385549	0.0981785
WBGene00008621	F09C8.1	protein_coding	3814.57	97.894	46.795	129.96	158.243	-1.06376	2.41034e-10	0.283987	0.0987384
WBGene00018448	F45D11.1	pseudogene	244.671	5.174	12.991	1.694	1.158	1.32416	5.50135e-06	-0.546811	0.100028
WBGene00003463	msp-76	protein_coding	46.974	1.952	6.255	1.999	4.13	1.68793	0.0192993	1.044	0.100754
WBGene00020019	R12B2.3	protein_coding	37.0191	1.207	2.745	1.081	1.887	1.16361	0.0348177	0.795232	0.102167
WBGene00017386	nspd-5	protein_coding	62.1855	3.492	11.259	3.547	6.397	1.68826	0.00295301	0.859277	0.102184
WBGene00018278	F41C6.4	protein_coding	355.991	4.8	10.441	9.211	11.468	1.1237	2.02862e-08	0.317868	0.102958
WBGene00219342	Y57G11C.1143	protein_coding	34.7726	1.117	5.987	0.65	1.34	2.42533	1.82406e-05	1.0019	0.106221
WBGene00001399	fat-7	protein_coding	990.471	23.004	48.509	23.539	28.452	1.07752	2.99043e-11	0.273527	0.107154
WBGene00015949	C18A11.3	protein_coding	533.348	18.132	8.622	25.222	31.334	-1.05981	1.64634e-07	0.313324	0.107233
WBGene00009926	noah-2	protein_coding	1701.89	14.705	7.151	39.185	31.508	-1.03706	2.09309e-07	-0.314254	0.108888
WBGene00002224	klp-13	protein_coding	141.264	1.445	3.329	1.922	1.388	1.20725	4.74529e-05	-0.465986	0.113993
WBGene00001067	dpy-5	protein_coding	1340.95	15.316	3.067	122.407	61.177	-2.31995	0.000673454	-1.00068	0.114679
WBGene00022040	Y65B4BR.1	protein_coding	425.597	8.154	3.457	20.252	16.346	-1.23599	4.97223e-09	-0.30862	0.115511
WBGene00003450	msp-57	protein_coding	70.6554	3.729	8.99	3.339	5.324	1.26865	0.00584933	0.673829	0.115531
WBGene00014698	C37A5.3	protein_coding	78.374	5.814	12.117	7.018	4.807	1.06478	0.00369625	-0.550061	0.117957
WBGene00011428	nlp-80	protein_coding	1334.99	119.623	56.688	98.177	82.715	-1.08027	1.03842e-12	-0.247072	0.121072
WBGene00194985	Y25C1A.14	protein_coding	539.609	52.61	20.537	33.892	27.564	-1.36359	4.09578e-14	-0.297342	0.121273
WBGene00011176	R09E10.6	protein_coding	116.572	2.158	7.133	2.311	3.681	1.72738	0.000118507	0.675107	0.122647
WBGene00001074	dpy-13	protein_coding	1249.33	11.193	2.061	105.574	51.253	-2.43872	0.000811584	-1.04257	0.122708
WBGene00021580	clec-174	protein_coding	138.255	0.991	9.585	1.795	1.239	3.2791	2.09663e-26	-0.523492	0.126583
WBGene00003661	nhr-71	protein_coding	521.409	5.56	15.093	6.231	5.005	1.4418	1.79362e-14	-0.311222	0.128603
WBGene00001066	dpy-4	protein_coding	1091.12	9.595	2.084	90.49	44.143	-2.19716	0.00376349	-1.03562	0.132393
WBGene00235093	C54F6.18	protein_coding	131.943	30.08	10.49	13.748	10.52	-1.53454	7.93038e-11	-0.390324	0.133689
WBGene00000702	col-128	protein_coding	347.476	4.215	0.274	16.829	13.269	-3.96302	5.08979e-30	-0.34424	0.134072
WBGene00015560	C07A12.2	protein_coding	75.4384	23.06	10.439	13.375	9.51	-1.13499	0.000728315	-0.50108	0.136086
WBGene00010274	F58G6.3	protein_coding	300.434	42.838	20.961	19.834	24.844	-1.03141	6.92586e-07	0.321672	0.136376
WBGene00022982	F09E10.10	ncRNA	76.5125	2.845	9.218	7.026	4.916	1.684	3.66793e-06	-0.515198	0.136469
WBGene00020394	T10B5.8	protein_coding	113.708	2.189	4.385	2.418	1.768	1.00549	0.00147368	-0.455947	0.142568
WBGene00004076	pod-2	protein_coding	11311.1	35.526	80.5	67.564	45.89	1.18012	0.00407573	-0.557989	0.143546
WBGene00000665	col-90	protein_coding	1305.14	10.309	1.161	86.113	57.817	-3.15264	3.27947e-15	-0.574942	0.144703
WBGene00007233	C01G10.6	protein_coding	462.273	54.272	20.863	42.462	54.608	-1.37644	1.81455e-08	0.362987	0.145188
WBGene00021072	W07B8.4	protein_coding	240.464	6.092	2.702	11.644	9.322	-1.16258	1.67064e-06	-0.32188	0.147897
WBGene00045417	Y37H2A.13	protein_coding	1289.27	166.608	33.14	79.646	92.305	-2.33072	1.42751e-69	0.212498	0.14984
WBGene00019858	R03H10.6	protein_coding	138.949	1.059	6.55	1.069	1.408	2.62734	3.34341e-27	0.407133	0.153706
WBGene00000715	col-142	protein_coding	416.382	6.931	23.967	10.471	13.412	1.79199	3.81613e-14	0.358781	0.153844
WBGene00219586	linc-108	lincRNA	64.5239	2.591	8.679	4.26	2.818	1.73868	4.78438e-05	-0.603767	0.160114
WBGene00022650	ZK84.2	protein_coding	58.1296	1.03	3.894	2.167	3.168	1.90157	7.85901e-06	0.550234	0.160532
WBGene00020859	bath-25	protein_coding	160.306	3.263	8.837	5.377	7.145	1.44149	8.77243e-07	0.40589	0.161114
WBGene00000623	col-46	protein_coding	99.2654	1.291	0.19	6.271	4.422	-2.73833	4.66691e-07	-0.507557	0.162002
WBGene00004335	ref-2	protein_coding	106.777	2.498	1.247	3.489	2.694	-1.02351	0.000811545	-0.376695	0.164264
WBGene00045261	H29C22.1	protein_coding	4235.28	374.832	167.177	291.674	327.935	-1.16485	7.20308e-26	0.168701	0.166584
WBGene00012257	lpr-4	protein_coding	1121.56	22.458	10.096	44.236	37.027	-1.14908	3.04772e-10	-0.256821	0.168375
WBGene00020860	nspd-10	protein_coding	27.8582	1.578	4.816	1.905	3.277	1.598	0.0125758	0.792051	0.169064
WBGene00016351	C33F10.1	protein_coding	41.7924	1.425	4.357	1.419	2.416	1.62068	0.00695113	0.774082	0.169465
WBGene00001556	gcy-36	protein_coding	190.662	2.97	1.019	4.306	3.443	-1.55696	2.81317e-10	-0.32033	0.176442
WBGene00006366	sym-1	protein_coding	1323.21	15.059	5.556	30.807	26.142	-1.437	1.21258e-17	-0.236484	0.178721
WBGene00003431	msp-33	protein_coding	57.1187	3.274	8.377	2.25	3.577	1.36145	0.00836891	0.674083	0.180013
WBGene00020084	R105.1	protein_coding	51.0975	1.439	4.179	1.757	2.731	1.54221	0.00247257	0.637437	0.183539
WBGene00008152	C47E12.9	protein_coding	247.847	15.179	7.373	17.171	14.051	-1.04378	2.71573e-06	-0.289985	0.184824
WBGene00007440	C08E8.4	protein_coding	1595.92	102.648	44.352	60.244	51.025	-1.21153	4.42395e-13	-0.239848	0.18564
WBGene00003443	msp-50	protein_coding	32.7968	1.202	4.125	1.658	2.784	1.78091	0.00459507	0.74903	0.192831
WBGene00003426	msp-19	protein_coding	55.0385	2.425	7.204	2.619	4.419	1.57498	0.0128083	0.758281	0.193638
WBGene00019101	F59B1.10	protein_coding	141.479	1.597	10.148	1.079	1.468	2.66122	1.75767e-22	0.440812	0.196881
WBGene00000903	daf-7	protein_coding	395.086	10.839	5.343	10.415	8.339	-1.01906	4.91293e-05	-0.321318	0.197238
WBGene00019306	K02E7.1	protein_coding	115.376	9.664	4.514	9.397	12.966	-1.11457	0.00516347	0.46239	0.197895
WBGene00023483	Y75B8A.39	protein_coding	125.711	10.824	4.374	5.488	7.667	-1.31598	0.000669471	0.485873	0.198105
WBGene00304201	T07H8.11	protein_coding	65.0039	7.981	3.66	7.744	5.509	-1.14368	0.00692075	-0.498385	0.19837
WBGene00009756	F46B3.1	protein_coding	179.219	2.897	16.474	8.612	11.233	2.50911	3.42452e-17	0.385895	0.199194
WBGene00000556	cnc-2	protein_coding	976.239	69.452	26.21	114.112	170.481	-1.40804	0.0034384	0.57886	0.200146
WBGene00304203	D1086.21	protein_coding	50.8738	2.11	4.975	1.841	2.601	1.23167	0.00233555	0.513751	0.204733
WBGene00012261	lpr-3	protein_coding	1053.65	12.478	5.188	29.305	24.316	-1.26087	1.152e-09	-0.268705	0.20575
WBGene00003464	msp-77	protein_coding	33.1479	1.353	3.474	2.067	3.41	1.36326	0.0451652	0.731253	0.207187
WBGene00021779	Y51H7C.1	protein_coding	292.068	7.558	1.877	9.155	11.072	-1.99732	2.41076e-19	0.277341	0.207721
WBGene00016274	C30G12.2	protein_coding	289.232	6.672	21.191	4.828	5.911	1.66759	1.79684e-17	0.290511	0.208307
WBGene00017149	EGAP4.1	protein_coding	742.056	69.576	24.169	56.1	47.533	-1.53116	1.74864e-18	-0.23923	0.208487
WBGene00022496	fbxa-92	protein_coding	44.0286	7.318	0.932	0.765	2.249	-2.98291	0.0282329	1.55804	0.210329
WBGene00006053	ssq-4	protein_coding	64.1374	0.994	3.189	1.322	2.051	1.68543	0.00177054	0.639898	0.21103
WBGene00003435	msp-40	protein_coding	59.0969	3.179	8.577	2.483	3.812	1.43403	0.00440025	0.618082	0.212142
WBGene00012135	T28F3.9	protein_coding	94.398	2.969	1.461	1.984	2.638	-1.00864	0.00345028	0.404359	0.213077
WBGene00002094	ins-11	protein_coding	236.117	19.386	40.037	32.984	26.712	1.04722	1.82406e-05	-0.304018	0.213097
WBGene00019368	K03H6.2	protein_coding	1832.57	63.252	20.546	80.727	72.027	-1.62113	1.35962e-41	-0.164208	0.214021
WBGene00014183	ZK1025.3	protein_coding	147.215	0.326	0.1	6.947	9.697	-1.76828	0.0406152	0.479531	0.21676
WBGene00010528	K03D3.2	protein_coding	176.455	8.271	25.637	9.793	12.474	1.62675	5.48271e-10	0.349399	0.216781
WBGene00022254	nlp-71	protein_coding	328.86	28.283	14.137	28.197	22.738	-1.00713	9.65238e-05	-0.310291	0.225392
WBGene00011644	T09B9.3	protein_coding	172.38	8.072	2.506	7.254	5.916	-1.69643	4.46244e-13	-0.292929	0.226468
WBGene00270321	Y41C4A.32	protein_coding	244.429	17.429	4.266	9.349	7.279	-2.02645	1.87985e-13	-0.36236	0.226831
WBGene00000732	col-159	protein_coding	180.039	1.46	7.521	8.833	5.514	2.36817	4.74529e-05	-0.67913	0.231423
WBGene00000656	col-80	protein_coding	2322.38	28.34	150.088	52.925	72.441	2.40521	7.00088e-12	0.453122	0.234216
WBGene00001552	gcy-32	protein_coding	302.151	5.159	2.038	6.92	5.846	-1.34333	6.13197e-11	-0.245268	0.238273
WBGene00010504	K02D3.1	protein_coding	120.399	6.617	2.903	6.07	4.736	-1.20325	0.000118379	-0.36156	0.239306
WBGene00194821	dmsr-16	protein_coding	98.0601	2.858	6.262	2.114	2.802	1.13637	0.000654097	0.408539	0.239511
WBGene00000748	col-175	protein_coding	40.554	0.4	3.055	0.895	1.569	2.93718	6.01852e-05	0.816576	0.240241
WBGene00008105	C45B11.2	protein_coding	60.4885	4.63	1.694	1.933	2.736	-1.42963	0.00084894	0.503889	0.240556
WBGene00010031	F54B11.8	protein_coding	36.5577	1.172	3.154	2.508	1.704	1.43186	0.00780491	-0.572383	0.242528
WBGene00001772	gst-24	protein_coding	1174.85	13.695	180.615	11.302	13.236	3.72049	1.87859e-121	0.231524	0.242641
WBGene00016092	cyp-33B1	protein_coding	135.084	2.225	7.225	1.803	1.42	1.69354	1.96887e-12	-0.343795	0.246271
WBGene00045061	Y57G11B.8	protein_coding	63.6585	4.816	10.524	6.594	8.78	1.13486	0.0031366	0.415579	0.247383
WBGene00016161	C27D6.3	protein_coding	35.987	1.283	3.982	1.568	2.502	1.6424	0.0094345	0.683375	0.247684
WBGene00017301	hach-1	protein_coding	4322.15	64.657	148.36	76.159	84.804	1.1984	1.01392e-23	0.155038	0.251056
WBGene00001388	far-4	protein_coding	66.8657	4.06	1.938	3.251	4.471	-1.0838	0.0135662	0.453949	0.251201
WBGene00023503	F17C11.13	protein_coding	129.934	11.586	5.691	7.143	9.199	-1.03162	0.0011009	0.355341	0.251983
WBGene00009953	F53A2.9	protein_coding	319.562	4.806	11.922	5.377	6.334	1.31094	4.11855e-12	0.237793	0.257121
WBGene00003474	mtl-2	protein_coding	13012.8	1006.35	2100.86	1022.18	1144.41	1.06182	1.73942e-16	0.162759	0.258436
WBGene00206533	C30A5.16	protein_coding	42.2433	4.073	8.265	2.694	4.042	1.01823	0.0486857	0.561161	0.260287
WBGene00007594	lgc-23	protein_coding	81.8024	3.388	1.536	1.948	2.543	-1.1574	0.000788112	0.383674	0.261305
WBGene00017060	D2063.1	protein_coding	477.725	11.193	23.706	14.584	12.607	1.07997	2.8108e-10	-0.20924	0.264803
WBGene00012878	Y45F10C.2	protein_coding	3391.9	358.217	162.363	299.393	268.344	-1.14187	4.27144e-19	-0.157926	0.271797
WBGene00044719	clec-172	protein_coding	99.8031	8.46	3.618	8.685	6.714	-1.22921	0.000570436	-0.372665	0.279069
WBGene00005657	srr-6	protein_coding	164.097	3.454	7.333	3.513	4.377	1.09222	0.000139929	0.319312	0.280394
WBGene00021197	Y17G9A.4	protein_coding	348.481	19.503	9.109	16.12	19.204	-1.10439	6.47446e-07	0.248843	0.280894
WBGene00004134	myrf-1	protein_coding	664.432	4.548	1.819	10.64	8.455	-1.31466	1.655e-05	-0.330589	0.281189
WBGene00008575	scl-24	protein_coding	67.0663	5.294	2.459	3.382	4.451	-1.10157	0.00473119	0.401879	0.281963
WBGene00013648	Y105C5B.7	pseudogene	57.2474	3.14	1.122	1.197	1.634	-1.5239	0.000180727	0.457696	0.282848
WBGene00000009	aat-8	protein_coding	83.3069	1.105	2.713	2.256	1.788	1.29351	6.76773e-05	-0.337168	0.288276
WBGene00219295	C34C12.12	protein_coding	36.1495	4.567	9.388	7.91	10.771	1.03616	0.0474783	0.451088	0.303646
WBGene00009377	F34D10.8	protein_coding	44.2476	2.533	8.054	3.539	5.158	1.66436	0.00248664	0.54509	0.303669
WBGene00021435	Y39A3A.4	protein_coding	148.267	3.217	8.25	5.032	4.177	1.3613	2.59141e-08	-0.267868	0.310857
WBGene00220084	T23B12.14	ncRNA	45.6081	18.398	40.197	24.763	18.107	1.1248	0.0170632	-0.46111	0.312228
WBGene00018418	F44E2.4	protein_coding	901.493	5.749	2.294	11.938	10.114	-1.32115	3.36446e-09	-0.238766	0.312363
WBGene00017599	F19F10.3	protein_coding	325.232	32.322	14.587	23.951	27.319	-1.15502	1.48094e-11	0.188179	0.313624
WBGene00020715	nspd-4	protein_coding	37.0546	1.636	5.049	2.049	2.926	1.62058	0.00209811	0.513718	0.320797
WBGene00219743	linc-103	lincRNA	73.4625	1.604	3.237	1.997	1.561	1.00753	0.00525696	-0.357696	0.321909
WBGene00018731	F53A9.8	protein_coding	72951.4	7681.78	3384.11	9406.5	10426.6	-1.18271	2.22882e-19	0.14853	0.322351
WBGene00007141	pitr-4	protein_coding	71.1009	0.773	0.383	2.107	2.717	-1.00451	0.0464833	0.364734	0.324602
WBGene00012046	T26E4.4	protein_coding	74.5777	1.387	0.106	3.693	2.961	-3.87318	3.45726e-11	-0.32085	0.32654
WBGene00016301	fbxc-6	pseudogene	51.7651	1.505	3.771	1.647	1.195	1.31424	0.00333997	-0.451768	0.333079
WBGene00005703	sru-40	protein_coding	212.014	9.086	4.166	9.129	7.833	-1.12936	4.27524e-07	-0.223681	0.334368
WBGene00016058	nspd-3	protein_coding	50.2541	2.961	10.022	3.29	4.648	1.75888	0.000843141	0.516464	0.336055
WBGene00015449	ugt-63	protein_coding	744.15	15.799	35.584	7.762	8.898	1.17148	8.80987e-12	0.194615	0.337079
WBGene00010940	M163.8	protein_coding	160.443	11.502	5.215	6.706	7.85	-1.13469	2.06436e-07	0.228271	0.337407
WBGene00004002	pgp-8	protein_coding	263.71	0.348	7.691	0.432	0.529	4.47035	5.15234e-73	0.297576	0.339043
WBGene00022013	Y60C6A.1	protein_coding	54.6757	2.972	0.844	3.361	4.465	-1.83073	0.000102599	0.403808	0.340199
WBGene00255375	F08B4.8	protein_coding	44.0079	1.233	6.574	2.502	3.58	2.41506	1.49961e-05	0.521108	0.345632
WBGene00010747	K10D11.3	protein_coding	126.91	3.286	1.606	1.511	1.933	-1.0336	0.00561265	0.34896	0.349595
WBGene00016066	acd-2	protein_coding	135.713	2.857	1.316	2.51	2.032	-1.09487	0.000657265	-0.299688	0.351625
WBGene00044617	bus-1	protein_coding	213.757	1.83	0.625	6.302	5.406	-1.59766	8.49754e-09	-0.221123	0.352667
WBGene00044471	F56D6.9	protein_coding	59.9661	3.43	14.941	9.281	7.238	2.10885	9.07507e-08	-0.360776	0.363368
WBGene00009268	F30A10.11	protein_coding	202.269	97.876	12.918	8.391	9.948	-2.92334	1.04055e-50	0.252339	0.366701
WBGene00003981	pes-8	protein_coding	568.674	21.972	7.744	12.559	11.134	-1.50529	2.22882e-19	-0.173436	0.370687
WBGene00000712	col-139	protein_coding	648.31	8.607	39.879	15.468	21.882	2.2126	4.30728e-05	0.500812	0.377724
WBGene00016895	C53B7.6	protein_coding	49.3252	6.152	15.086	12.238	15.643	1.29585	0.00507995	0.366097	0.382514
WBGene00000624	col-47	protein_coding	37.1338	0.892	0.15	3.273	2.477	-2.49849	0.000878533	-0.410445	0.387762
WBGene00000728	col-155	protein_coding	1237.41	26.528	62.776	46.996	42.638	1.24477	3.90488e-18	-0.139342	0.396287
WBGene00020014	R11G11.6	protein_coding	102.673	2.415	1.006	12.429	10.228	-1.33011	0.00446244	-0.285186	0.398168
WBGene00019668	fil-2	protein_coding	128.891	3.86	8.383	3.068	2.568	1.1111	2.19562e-05	-0.256379	0.398354
WBGene00015052	clec-52	protein_coding	5820.48	132.435	371.88	134.677	151.482	1.48956	1.21258e-17	0.1697	0.400789
WBGene00006464	bath-47	protein_coding	222.334	4	1.923	4.7	4.043	-1.05862	2.39717e-05	-0.213801	0.402814
WBGene00013848	npr-29	protein_coding	166.595	7.213	3.314	5.247	4.466	-1.12985	1.78436e-05	-0.233374	0.406111
WBGene00303364	Y14H12A.5	protein_coding	84.7678	8.568	3.916	6.423	7.801	-1.13723	0.000667347	0.27549	0.408694
WBGene00018622	nhr-190	protein_coding	224.135	3.718	9.729	5.356	4.645	1.38596	2.93978e-10	-0.20484	0.409755
WBGene00016697	cyp-33C2	protein_coding	56.7389	1.091	2.827	0.641	0.826	1.36713	0.000405737	0.369082	0.413589
WBGene00206459	Y80D4G.1	pseudogene	393.777	8.543	23.335	11.254	12.629	1.45271	1.02443e-15	0.16998	0.416005
WBGene00016440	gipc-1	protein_coding	101.491	2.03	4.97	2.192	2.772	1.2917	0.00197637	0.34339	0.420248
WBGene00011307	mpst-7	protein_coding	214.283	4.778	1.496	8.455	7.461	-1.65402	5.68943e-13	-0.179896	0.423854
WBGene00077593	C49G7.12	protein_coding	230.575	15.432	6.974	7.018	8.159	-1.15109	1.99435e-06	0.213726	0.428319
WBGene00019653	K11G9.2	protein_coding	184.313	4.157	1.994	4.329	4.961	-1.06714	1.41817e-05	0.197175	0.429302
WBGene00002113	ins-30	protein_coding	89.6951	8.392	3.702	7.002	5.862	-1.15862	0.000299778	-0.255852	0.435486
WBGene00011950	T23F6.2	protein_coding	124.329	3.823	0.759	8.908	7.369	-2.31232	2.33189e-09	-0.275442	0.436638
WBGene00017991	clec-180	protein_coding	1198.09	10.965	5.211	22.649	20.092	-1.07703	2.6752e-07	-0.173206	0.441054
WBGene00017100	E02H9.2	protein_coding	192.18	6.856	18.604	7.008	6.178	1.4404	4.33945e-13	-0.186344	0.44265
WBGene00013071	Y51A2B.8	protein_coding	26.8398	8.693	2.758	5.138	6.978	-1.64355	0.00620529	0.440346	0.444841
WBGene00008577	F08G2.5	protein_coding	1261.8	15.463	158.221	22.738	20.673	3.35359	1.08404e-118	-0.13833	0.444887
WBGene00010034	F54B11.11	protein_coding	105.463	2.303	1.124	2.688	2.255	-1.01117	0.00486666	-0.255658	0.459612
WBGene00008631	F10A3.1	protein_coding	63.7506	1.258	11.79	1.181	0.918	3.2306	1.98943e-19	-0.371106	0.46809
WBGene00017715	F22F1.3	protein_coding	124.857	7.72	3.069	7.384	6.382	-1.34843	8.02128e-07	-0.206902	0.472463
WBGene00007459	C08F11.12	protein_coding	1999.66	220.448	107.905	206.625	190.308	-1.03147	8.62178e-13	-0.118629	0.475868
WBGene00194800	linc-83	lincRNA	53.762	6.109	2.905	4.369	5.351	-1.08629	0.00822521	0.285562	0.477122
WBGene00002107	ins-24	protein_coding	91.4106	11.096	3.867	7.537	6.382	-1.50678	1.13815e-06	-0.239756	0.478271
WBGene00006534	tba-8	protein_coding	357.698	5.65	0.866	13.375	12.014	-2.71838	2.75351e-31	-0.152952	0.486875
WBGene00016645	C44C1.6	protein_coding	213.044	19.755	9.514	15.677	13.786	-1.06518	2.1168e-05	-0.18563	0.493623
WBGene00017885	dip-2	protein_coding	1780.11	6.224	15.789	8.499	7.478	1.3434	1.17166e-08	-0.183372	0.494106
WBGene00016101	C25E10.12	protein_coding	2118.58	53.141	121.731	47.01	49.921	1.1951	8.56597e-31	0.0865293	0.499056
WBGene00021810	phf-15	protein_coding	419.927	3.423	7.798	5.207	4.589	1.19105	5.07903e-07	-0.178419	0.499056
WBGene00194925	K08D8.11	protein_coding	33.7152	2.938	8.023	4.24	5.511	1.43364	0.0125573	0.373517	0.502686
WBGene00002116	ins-33	protein_coding	104.989	4.447	1.066	10.473	12.033	-2.00512	4.85497e-08	0.20329	0.510752
WBGene00018200	btb-17	protein_coding	824.07	22.516	54.895	17.476	19.218	1.28425	3.77503e-13	0.136358	0.522903
WBGene00017432	F13H6.4	pseudogene	65.7965	1.237	2.668	1.102	0.921	1.10159	0.00251033	-0.257772	0.529085
WBGene00008762	ztf-2	protein_coding	239.863	3.931	1.655	6.78	6.084	-1.26739	1.64634e-07	-0.156217	0.531064
WBGene00011748	T13F2.9	pseudogene	91.7408	2.041	6.548	2.967	3.592	1.68435	6.36369e-05	0.283867	0.5327
WBGene00022887	ZK1290.5	protein_coding	1293.8	27.749	56.614	36.169	39.094	1.02924	2.26126e-11	0.111447	0.536773
WBGene00271822	F11G11.15	protein_coding	39.6395	3.048	7.191	4.988	6.021	1.25108	0.00780491	0.279278	0.537621
WBGene00012501	Y26D4A.3	protein_coding	30.4101	3.587	0.665	2.176	2.745	-2.39739	1.20508e-05	0.331798	0.542958
WBGene00011622	T08G5.1	protein_coding	53.8049	1.195	2.881	1.079	1.352	1.27618	0.00946869	0.314778	0.542984
WBGene00013685	Y105E8A.28	protein_coding	111.602	4.371	9.466	4.166	4.752	1.12158	0.000114207	0.186256	0.573535
WBGene00009900	F49E12.7	protein_coding	34.5719	2.931	1.015	2.17	1.749	-1.52195	0.00336227	-0.298878	0.573941
WBGene00001079	dpy-20	protein_coding	165.151	1.861	0.247	5.856	5.206	-2.90494	8.26179e-15	-0.171952	0.580504
WBGene00010032	F54B11.9	protein_coding	214.786	9.287	3.084	11.152	12.347	-1.60419	1.67941e-11	0.14273	0.581356
WBGene00003057	lon-3	protein_coding	728.429	10.076	1.957	40.264	36.328	-2.38449	8.36639e-21	-0.149224	0.585112
WBGene00002097	ins-14	protein_coding	56.3344	6.538	2.308	4.703	5.452	-1.50225	2.98779e-05	0.207389	0.585488
WBGene00194803	C25F9.16	protein_coding	104.011	6.735	24.779	7.064	6.072	1.87986	9.43523e-11	-0.199159	0.588331
WBGene00015977	C18F10.2	protein_coding	193.289	4.594	2.18	3.329	2.973	-1.07955	5.5057e-05	-0.160011	0.591092
WBGene00009681	gipc-2	protein_coding	126.303	2.875	6.561	2.722	3.188	1.18892	0.00293957	0.230531	0.592008
WBGene00006056	sss-1	protein_coding	65.8641	1.097	4.858	1.606	1.944	2.15121	3.47558e-06	0.279687	0.592135
WBGene00000703	col-129	protein_coding	537.822	3.432	31.079	12.011	16.369	3.17869	2.27881e-05	0.446849	0.592573
WBGene00007241	C01G10.16	protein_coding	72.978	8.594	3.449	5.923	6.94	-1.36492	0.000675109	0.225967	0.59426
WBGene00000707	col-133	protein_coding	49.4402	0.506	2.558	1.645	2.144	2.35645	0.00123126	0.381496	0.599587
WBGene00044644	B0205.13	protein_coding	52.114	8.126	3.42	2.915	3.397	-1.23753	0.001429	0.231168	0.606831
WBGene00045416	Y37H2A.14	protein_coding	985.733	102.243	22.863	43.738	47.808	-2.15793	5.97378e-27	0.127829	0.608279
WBGene00000190	arf-1.1	protein_coding	92.4474	12.952	2.323	2.682	3.083	-2.47335	9.16149e-17	0.197918	0.608965
WBGene00006576	tkr-1	protein_coding	115.516	5.229	2.473	3.056	3.392	-1.10038	2.8282e-05	0.149317	0.618187
WBGene00007450	C08F11.1	protein_coding	235.205	14.983	5.988	13.686	14.775	-1.31639	1.00934e-11	0.109242	0.618881
WBGene00019659	K11H12.3	protein_coding	30.5132	0.315	2.592	0.435	0.345	3.04978	8.92874e-08	-0.344611	0.626834
WBGene00022570	sdz-35	protein_coding	55.0977	3.385	1.637	2.083	2.431	-1.07537	0.0121036	0.215375	0.627865
WBGene00011563	jmjd-4	protein_coding	164.735	2.925	6.768	4.658	5.086	1.21136	8.76432e-07	0.132155	0.632381
WBGene00008714	F11F1.1	protein_coding	540.039	5.499	11.318	5.198	5.556	1.04024	6.80873e-10	0.0978208	0.634258
WBGene00021598	Y46E12BR.1	protein_coding	47.6566	1.141	2.841	1.423	1.232	1.32396	0.00108099	-0.214133	0.635512
WBGene00001068	dpy-6	protein_coding	676.406	5.052	0.803	9.639	8.233	-2.64569	1.48443e-10	-0.22707	0.636892
WBGene00001500	ftn-1	protein_coding	623.939	21.043	50.813	28.974	26.661	1.27118	8.53847e-09	-0.122392	0.640392
WBGene00269434	sqst-5	protein_coding	404.966	20.974	9.095	28.532	31.07	-1.21532	3.70458e-07	0.121869	0.648102
WBGene00020747	T24A6.7	protein_coding	110.053	3.911	15.016	2.345	2.641	1.93552	2.46818e-13	0.171215	0.64989
WBGene00019171	fipr-29	protein_coding	74.2468	6.437	17.511	5.229	5.89	1.43518	6.07493e-06	0.179591	0.650957
WBGene00019214	H20E11.2	protein_coding	95.6481	2.134	4.298	2.761	3.053	1.00942	0.000721896	0.146422	0.651362
WBGene00219655	linc-107	lincRNA	34.9279	2.28	6.33	2.055	1.68	1.4805	0.00483333	-0.274938	0.652038
WBGene00015999	prmt-4	protein_coding	35.1307	3.205	1.04	3.414	4.045	-1.66437	0.00525501	0.252241	0.655835
WBGene00015795	C15F1.2	protein_coding	671.771	4.862	1.628	13.83	14.784	-1.58908	7.72511e-16	0.0958476	0.657467
WBGene00000657	col-81	protein_coding	421.039	3.828	25.759	10.126	12.996	2.75054	0.000227748	0.36055	0.663059
WBGene00016016	C23G10.10	protein_coding	113.392	16.874	5.57	9.034	8.239	-1.62088	2.39101e-10	-0.132523	0.671039
WBGene00022760	ZK546.3	pseudogene	60.4065	3.721	9.217	4.792	4.225	1.29105	0.00101596	-0.18555	0.672305
WBGene00016892	pgph-3	protein_coding	210.882	4.284	11.606	3.696	4.023	1.4397	2.48283e-10	0.120443	0.677564
WBGene00000555	cnc-1	protein_coding	27.5241	5.773	2.294	7.057	5.978	-1.40234	0.0302717	-0.248415	0.678012
WBGene00011548	T06G6.6	protein_coding	660.25	11.097	1.883	47.178	43.48	-2.56446	2.54509e-21	-0.118767	0.682372
WBGene00194731	Y39A1A.27	protein_coding	52.6076	3.908	8.247	5.125	5.877	1.07703	0.0151053	0.185423	0.685051
WBGene00008963	F19H8.2	protein_coding	1170.72	27.673	13.1	55.616	58.553	-1.08914	4.32566e-12	0.074011	0.68657
WBGene00015152	B0348.2	protein_coding	137.735	10.9	3.228	10.607	11.698	-1.75424	7.99773e-08	0.143792	0.69352
WBGene00022256	Y73B6BL.37	protein_coding	61.0328	1.941	0.89	2.305	2.599	-1.15246	0.00948244	0.168544	0.695499
WBGene00000668	col-93	protein_coding	1062.75	10.772	58.06	34.424	40.566	2.43082	4.24556e-06	0.237188	0.698919
WBGene00000895	dac-1	protein_coding	188.388	3.246	6.577	3.711	3.978	1.01444	3.77095e-06	0.0984984	0.703745
WBGene00022415	Y102A11A.5	protein_coding	2119.11	125.012	52.101	168.659	178.698	-1.2654	6.26797e-12	0.0830399	0.711039
WBGene00009526	clec-169	protein_coding	679.504	18.604	8.941	17.986	19.232	-1.0586	4.11194e-06	0.0952933	0.720378
WBGene00018681	denn-4	protein_coding	533.616	2.107	4.537	3.707	3.269	1.10813	0.0228712	-0.180473	0.721118
WBGene00001757	gst-9	protein_coding	317.175	24.99	12.015	14.081	14.935	-1.0615	4.38333e-08	0.0845478	0.721345
WBGene00017634	F20D6.2	protein_coding	42.489	2.955	1.196	1.377	1.552	-1.33116	0.0017252	0.170779	0.724827
WBGene00018286	F41E6.5	protein_coding	4332.77	108.007	51.422	115.342	111.703	-1.07132	6.53004e-22	-0.0465111	0.742723
WBGene00000615	col-38	protein_coding	77.2468	1.549	3.759	2.898	3.284	1.28722	0.022234	0.185317	0.748203
WBGene00015348	C02F5.5	protein_coding	30.5002	1.197	3.176	0.992	1.13	1.4004	0.0128083	0.201765	0.756909
WBGene00045096	K01A6.7	protein_coding	235.083	17.44	37.335	24.477	23.001	1.09097	1.97756e-05	-0.0926516	0.75798
WBGene00002109	ins-26	protein_coding	117.891	11.607	5.421	9.079	9.772	-1.09213	0.000575224	0.107244	0.762662
WBGene00194703	F26B1.8	protein_coding	56.7609	2.024	6.672	2.371	2.044	1.72421	0.00458112	-0.205329	0.765277
WBGene00015342	C02E7.10	protein_coding	51.9703	6.177	2.569	6.672	7.38	-1.25332	0.00888333	0.141742	0.769373
WBGene00017851	F27C1.1	protein_coding	107.736	1.815	7.682	3.341	3.673	2.08168	3.70458e-07	0.140226	0.774838
WBGene00007992	fipr-24	protein_coding	45.61	1.899	7.339	2.652	3.009	1.94957	0.000280543	0.165726	0.791178
WBGene00012228	W03H9.2	protein_coding	120.379	4.175	8.947	4.509	4.785	1.09496	7.85537e-05	0.0883909	0.792897
WBGene00006610	tre-4	protein_coding	229.725	4.822	2.364	5.071	4.841	-1.02196	1.59516e-06	-0.0653799	0.793144
WBGene00007550	C13C4.6	protein_coding	167.553	3.597	1.528	4.317	4.547	-1.23204	4.53482e-06	0.0791871	0.794521
WBGene00007891	C33B4.2	protein_coding	69.9379	2.473	1.197	3.223	2.978	-1.06489	0.0169798	-0.116325	0.797813
WBGene00007989	fipr-22	protein_coding	89.7078	3.51	7.354	3.947	4.285	1.07135	0.00363241	0.107349	0.799097
WBGene00019901	R05G6.9	protein_coding	137.405	1.586	0.38	6.438	6.022	-2.12169	6.16209e-07	-0.0988832	0.800313
WBGene00020703	T22F7.4	protein_coding	633.792	38.597	18.596	32.115	33.087	-1.05448	9.69893e-15	0.0436397	0.803103
WBGene00014883	Y39C12A.2	pseudogene	29.223	1.012	3.353	1.258	1.419	1.71346	0.00552341	0.174219	0.805138
WBGene00044478	K06B9.6	protein_coding	89.8463	5.691	11.744	4.683	5.007	1.04912	0.000410749	0.0863112	0.81841
WBGene00044937	ZK546.18	snoRNA	36.7222	4.174	14.965	10.033	10.906	1.85246	0.00019259	0.118607	0.822444
WBGene00020790	T25B6.4	protein_coding	30.2283	3.799	1.754	2.652	2.45	-1.11668	0.0468093	-0.130676	0.827386
WBGene00194883	B0496.11	protein_coding	89.8187	11.421	5.784	9.542	8.941	-1.00589	0.00838336	-0.0910948	0.828997
WBGene00219579	linc-43	lincRNA	37.6283	2.103	4.456	3.18	3.444	1.07285	0.0294792	0.11076	0.829647
WBGene00044238	C30H6.12	protein_coding	35.5555	1.134	4.817	0.728	0.782	2.08691	4.15435e-06	0.13586	0.839587
WBGene00194855	Y75B8A.44	protein_coding	144.098	17.575	8.622	14.34	14.996	-1.03721	0.000154993	0.0632092	0.844677
WBGene00015706	C12D5.3	protein_coding	88.4539	6.742	1.916	4.943	5.191	-1.83958	3.33599e-08	0.077194	0.847348
WBGene00007806	clec-230	protein_coding	25.656	3.425	1.03	1.02	1.124	-1.72826	0.00531141	0.144978	0.848086
WBGene00206460	F56H9.9	protein_coding	28.0704	7.898	3.263	3.611	3.863	-1.30617	0.0160815	0.115232	0.856038
WBGene00003995	pgp-1	protein_coding	760.118	7.155	3.13	8.387	8.133	-1.1883	2.95377e-10	-0.0434105	0.856662
WBGene00022522	ZC132.3	protein_coding	53.6146	2.637	1.017	2.29	2.177	-1.39465	0.000135077	-0.0727988	0.861864
WBGene00000256	bli-6	protein_coding	42.499	0.528	2.52	1.364	1.235	2.26077	0.00351598	-0.138734	0.873512
WBGene00044292	F56D6.8	protein_coding	66.8476	4.206	11.505	6.349	6.099	1.43593	0.00013274	-0.0681202	0.88159
WBGene00011923	chhy-1	protein_coding	355.708	9.292	4.601	8.419	8.618	-1.01436	4.59713e-09	0.0324937	0.883105
WBGene00008807	F14F3.4	protein_coding	48.8552	2.39	0.649	5.938	6.244	-1.92988	0.00136634	0.0711556	0.898755
WBGene00044278	F09C6.14	protein_coding	33.7584	9.498	4.366	3.563	3.81	-1.14768	0.036397	0.0826446	0.901168
WBGene00195246	ZK546.19	protein_coding	25.4274	2.247	5.704	2.729	2.899	1.33956	0.0287225	0.085792	0.902857
WBGene00013580	Y79H2A.3	protein_coding	970.144	3.228	7.93	5.526	5.363	1.29781	8.99116e-07	-0.0415217	0.903297
WBGene00050939	C05G5.7	protein_coding	889.345	18.045	2.179	63.578	62.135	-3.06126	3.93536e-37	-0.0337732	0.907486
WBGene00013584	nhr-243	protein_coding	354.536	7.994	18.37	6.323	6.424	1.19879	2.94101e-14	0.0267356	0.90801
WBGene00018823	F54E2.1	protein_coding	1377.27	54.949	21.987	39.133	38.41	-1.31896	9.36147e-13	-0.0271109	0.914903
WBGene00016686	cyp-33C1	protein_coding	48.9623	0.518	2.55	0.709	0.729	2.30021	1.37174e-07	0.0613643	0.917431
WBGene00044687	B0563.9	protein_coding	31.6034	5.523	2.347	6.116	5.871	-1.22187	0.0354339	-0.0618576	0.919689
WBGene00018760	irg-3	protein_coding	304.718	12.92	5.973	17.008	17.342	-1.10587	4.11194e-06	0.0294378	0.922143
WBGene00219709	linc-37	lincRNA	164.621	11.427	29.225	17.633	17.306	1.34988	8.70664e-08	-0.0326208	0.922537
WBGene00006636	tsp-10	protein_coding	903.14	42.451	19.804	41.987	41.47	-1.10294	5.47184e-17	-0.0174078	0.923785
WBGene00013609	clec-37	protein_coding	79.7853	4.32	1.903	2.273	2.333	-1.19889	0.000140226	0.0380728	0.926375
WBGene00000722	col-149	protein_coding	238.56	4.617	0.983	13.093	12.823	-2.20888	3.88294e-14	-0.0288315	0.929031
WBGene00045473	F30A10.14	protein_coding	1889.24	51.913	117.766	157.087	155.561	1.18234	2.76197e-24	-0.0138382	0.931446
WBGene00003429	msp-31	protein_coding	57.2915	3.035	6.611	5.419	5.594	1.12386	0.019934	0.0452134	0.934214
WBGene00021195	Y17G9A.2	protein_coding	79.1967	5.487	1.508	3.982	4.054	-1.86775	1.49488e-09	0.0309413	0.937738
WBGene00045275	F18E3.12	protein_coding	132.434	7.697	19.022	9.583	9.431	1.30855	1.23673e-05	-0.0290427	0.941758
WBGene00194916	F35D2.6	protein_coding	129.166	2.592	1.243	3.403	3.475	-1.09404	0.0013761	0.0278582	0.944508
WBGene00004811	skr-5	protein_coding	223.927	18.923	9.315	18.358	18.57	-1.02482	5.8726e-07	0.0183104	0.944599
WBGene00008507	F01G10.4	protein_coding	167.857	2.331	12.544	6.66	6.531	2.4327	1.05575e-15	-0.0275688	0.945269
WBGene00022572	ZC239.14	protein_coding	146.604	14.073	3.326	6.678	6.562	-2.07658	1.19345e-11	-0.0284868	0.946356
WBGene00045208	F13E9.15	protein_coding	519.984	61.889	29.521	48.778	48.271	-1.07382	3.06059e-08	-0.0159057	0.951173
WBGene00010455	K01B6.4	protein_coding	46.7401	5.065	2.55	4.127	4.226	-1.00059	0.0304078	0.0295679	0.954977
WBGene00044376	Y49F6B.12	protein_coding	75.7748	3.717	7.449	9.107	8.996	1.01478	0.00446244	-0.0201539	0.958691
WBGene00018035	sek-4	protein_coding	633.82	25.514	12.764	20.68	20.884	-1.00592	8.23674e-08	0.0129524	0.959068
WBGene00220142	Y37F4.15	ncRNA	46.2301	37.039	10.734	24.109	23.86	-1.80275	8.66281e-05	-0.029162	0.959426
WBGene00015711	C12D5.10	protein_coding	80.5846	3.555	1.334	3.014	2.983	-1.44888	1.48424e-05	-0.0208161	0.959895
WBGene00019660	K11H12.4	protein_coding	408.111	5.053	15.697	11.392	11.14	1.63575	0.00311424	-0.0319058	0.962198
WBGene00015894	acdh-2	protein_coding	189.363	2.312	7.4	3.335	3.308	1.68409	1.56361e-09	-0.013105	0.973089
WBGene00009682	msd-2	protein_coding	35.6175	1.503	4.528	2.51	2.523	1.58425	0.0111912	0.0247563	0.97324
WBGene00011463	T05A10.6	protein_coding	118.463	11.71	5.212	6.161	6.103	-1.15613	1.07361e-05	-0.0111773	0.975468
WBGene00000069	acy-2	protein_coding	177.05	1.507	3.15	1.408	1.411	1.07003	2.68867e-05	0.0087616	0.979649
WBGene00009823	gadr-6	protein_coding	253.272	2.689	7.274	2.477	2.487	1.44049	1.19681e-14	0.00636649	0.981608
WBGene00008539	F02H6.6	protein_coding	131.955	3.751	9.674	3.762	3.764	1.36853	6.38845e-06	-0.00265159	0.995408
WBGene00018725	kreg-1	protein_coding	238.459	14.731	29.833	22.142	22.166	1.02213	2.50869e-05	0.00171261	0.996142
WBGene00014864	Y18D10A.22	protein_coding	74.4611	4.894	2.224	2.149	2.151	-1.14006	0.00180983	0.0008577	0.998666
WBGene00044772	T23E7.6	protein_coding	327.096	62.584	21.55	55.114	55.3	-1.53758	4.02673e-16	0.000399754	0.998856
